# Supplementary material
Source: PubMed Central journal article supplement (PMC8500588)

**Table S1. Upregulated coding Genes in YAP1 OFF D6 tumors compared to YAP1 ON.** Upregulated genes in YAP1 OFF D6/ YAP1 ON tumor RNA-Seq include major urinary proteins (Mups), cytochrome p450 enzymes, and other metabolic liver enzymes. Coding genes with a p-value<0.05 shown.

|             | <b>Fold Change</b>                                     |                |
|-------------|--------------------------------------------------------|----------------|
| <b>Gene</b> | <b>FC (Mean(YAP1 OFF)+0.01) / (Mean(YAP1 ON)+0.01)</b> | <b>p-value</b> |
| Mup22       | 3755.29                                                | 0.00           |
| Mup10       | 3230.00                                                | 0.00           |
| Mup9        | 895.47                                                 | 0.00           |
| Mup2        | 585.44                                                 | 0.02           |
| Mup11       | 545.53                                                 | 0.00           |
| Sult3a1     | 299.86                                                 | 0.01           |
| Mup1        | 259.14                                                 | 0.00           |
| Mup17       | 179.48                                                 | 0.00           |
| Mup12       | 177.24                                                 | 0.04           |
| Mup15       | 78.69                                                  | 0.05           |
| A1bg        | 58.25                                                  | 0.01           |
| Sult2a8     | 57.99                                                  | 0.01           |
| Cyp3a44     | 57.47                                                  | 0.02           |
| Ces3b       | 30.89                                                  | 0.02           |
| Rfx4        | 30.06                                                  | 0.01           |
| Cyp3a16     | 21.23                                                  | 0.01           |
| Cyp2b13     | 19.54                                                  | 0.01           |
| Cyp2c69     | 17.17                                                  | 0.01           |
| Ces3a       | 14.19                                                  | 0.01           |
| Cyp2b9      | 13.58                                                  | 0.04           |
| Cpsf4l      | 13.27                                                  | 0.01           |
| Cyp3a41b    | 12.42                                                  | 0.01           |
| Cyp3a41a    | 11.65                                                  | 0.01           |
| Mup3        | 11.64                                                  | 0.02           |
| Cyp2c40     | 11.06                                                  | 0.01           |
| Cyp17a1     | 10.94                                                  | 0.01           |
| Sult2a1     | 10.60                                                  | 0.00           |
| Car3        | 10.33                                                  | 0.00           |
| Cyp2g1      | 9.80                                                   | 0.00           |
| Sult2a2     | 7.61                                                   | 0.00           |

|           |      |      |
|-----------|------|------|
| Cyp26b1   | 6.95 | 0.00 |
| Oat       | 6.64 | 0.01 |
| Cyp26a1   | 6.56 | 0.01 |
| Cyp2c54   | 6.41 | 0.01 |
| Cyp2c37   | 6.40 | 0.01 |
| Ido2      | 6.38 | 0.02 |
| Gm21748   | 6.25 | 0.00 |
| Slc10a1   | 6.20 | 0.02 |
| Lrit2     | 6.17 | 0.04 |
| Gm4756    | 6.10 | 0.01 |
| Gm21860   | 5.97 | 0.00 |
| Lrit1     | 5.82 | 0.02 |
| Sult2a5   | 5.55 | 0.02 |
| Dio1      | 5.44 | 0.01 |
| Orm3      | 5.29 | 0.02 |
| Serpina3k | 5.27 | 0.04 |
| Esrrg     | 5.22 | 0.05 |
| Aox3      | 5.16 | 0.01 |
| Ugt3a1    | 5.14 | 0.01 |
| Lin7a     | 5.09 | 0.01 |
| Nat8f2    | 5.07 | 0.01 |
| P2ry4     | 5.01 | 0.03 |
| Acacb     | 4.97 | 0.03 |
| Ces1b     | 4.92 | 0.01 |
| Slc22a26  | 4.82 | 0.02 |
| Rtp3      | 4.64 | 0.01 |
| Upp2      | 4.63 | 0.02 |
| Sc5d      | 4.56 | 0.01 |
| Ces1f     | 4.55 | 0.03 |
| Sult2a4   | 4.50 | 0.01 |
| Car5a     | 4.46 | 0.01 |
| Ugt2b37   | 4.42 | 0.01 |
| Rdh9      | 4.36 | 0.03 |
| Cyp2d40   | 4.35 | 0.00 |
| Stx1b     | 4.33 | 0.01 |
| Cyp2c29   | 4.33 | 0.01 |

|          |      |      |
|----------|------|------|
| Acss2    | 4.28 | 0.02 |
| F11      | 4.23 | 0.03 |
| Slc47a1  | 4.21 | 0.02 |
| Apoa2    | 4.20 | 0.00 |
| Cyp4a10  | 4.17 | 0.05 |
| Cacna1a  | 4.14 | 0.05 |
| Hsd3b7   | 4.14 | 0.01 |
| Slc27a5  | 4.06 | 0.02 |
| Slco1a1  | 4.06 | 0.01 |
| Sucnr1   | 4.02 | 0.04 |
| Hao      | 4.02 | 0.01 |
| Ces1d    | 4.01 | 0.01 |
| Pbld2    | 4.00 | 0.03 |
| Cyp8b1   | 3.93 | 0.02 |
| Mbl2     | 3.93 | 0.02 |
| Ces1e    | 3.86 | 0.02 |
| Ccl4     | 3.86 | 0.01 |
| Agxt     | 3.84 | 0.03 |
| Serpina6 | 3.83 | 0.02 |
| Rdh16f2  | 3.83 | 0.04 |
| Lhpp     | 3.76 | 0.01 |
| Urad     | 3.76 | 0.03 |
| Adh4     | 3.75 | 0.02 |
| Ugt2a3   | 3.72 | 0.02 |
| Ccl3     | 3.71 | 0.02 |
| Prlr     | 3.70 | 0.02 |
| Klkb1    | 3.66 | 0.02 |
| Sdr9c7   | 3.64 | 0.01 |
| Sult1d1  | 3.62 | 0.00 |
| Ang      | 3.62 | 0.01 |
| Neb      | 3.60 | 0.04 |
| Lipc     | 3.59 | 0.01 |
| Cyp2c70  | 3.58 | 0.01 |
| Aspdh    | 3.55 | 0.01 |
| Sult1c2  | 3.53 | 0.02 |
| Nat8f1   | 3.53 | 0.01 |

|          |      |      |
|----------|------|------|
| Phlda1   | 3.52 | 0.02 |
| Abca8a   | 3.51 | 0.04 |
| Fabp1    | 3.50 | 0.03 |
| Csrp3    | 3.49 | 0.00 |
| Gm4952   | 3.42 | 0.02 |
| Ces2c    | 3.42 | 0.01 |
| Scd1     | 3.36 | 0.03 |
| Gnmt     | 3.32 | 0.01 |
| Cyp1a2   | 3.30 | 0.03 |
| Gbp10    | 3.30 | 0.02 |
| Gpcpd1   | 3.26 | 0.02 |
| Rhbg     | 3.25 | 0.04 |
| Psen2    | 3.23 | 0.01 |
| Slc16a10 | 3.18 | 0.02 |
| Abcb11   | 3.17 | 0.03 |
| Slc2a5   | 3.14 | 0.02 |
| Slco1b2  | 3.12 | 0.01 |
| Cxcl10   | 3.11 | 0.02 |
| Cyp2c39  | 3.06 | 0.03 |
| Cyp7b1   | 3.06 | 0.02 |
| Saa4     | 3.02 | 0.04 |
| Gstt3    | 3.02 | 0.04 |
| Pde9a    | 3.02 | 0.05 |
| Nr0b2    | 3.00 | 0.02 |
| Ppm1k    | 3.00 | 0.05 |
| Hrg      | 2.99 | 0.03 |
| Hgd      | 2.98 | 0.02 |
| Bco2     | 2.98 | 0.02 |
| Cyp2c68  | 2.97 | 0.01 |
| Calr3    | 2.95 | 0.03 |
| Ass1     | 2.95 | 0.03 |
| Slc17a3  | 2.95 | 0.02 |
| Apon     | 2.95 | 0.03 |
| Cyp4a32  | 2.94 | 0.05 |
| F7       | 2.93 | 0.03 |
| Cyp2c67  | 2.89 | 0.02 |

|               |      |      |
|---------------|------|------|
| Fn3k          | 2.88 | 0.05 |
| Igfals        | 2.86 | 0.04 |
| Hpd           | 2.84 | 0.03 |
| Adh7          | 2.83 | 0.01 |
| Hmgcs1        | 2.81 | 0.04 |
| D130043K22Rik | 2.81 | 0.02 |
| Rnf125        | 2.79 | 0.04 |
| Keg1          | 2.79 | 0.04 |
| Slc6a12       | 2.77 | 0.05 |
| Fads2         | 2.77 | 0.05 |
| Kyat1         | 2.77 | 0.04 |
| Phospho1      | 2.77 | 0.04 |
| Acsm1         | 2.76 | 0.04 |
| Idi1          | 2.74 | 0.02 |
| Otc           | 2.72 | 0.03 |
| Tmem254c      | 2.71 | 0.01 |
| Paox          | 2.70 | 0.02 |
| Slc22a27      | 2.70 | 0.05 |
| Tmem254b      | 2.69 | 0.01 |
| Cdo1          | 2.68 | 0.02 |
| Hopx          | 2.68 | 0.01 |
| Prodh2        | 2.67 | 0.01 |
| C8g           | 2.66 | 0.01 |
| Dpyd          | 2.66 | 0.05 |
| Gulo          | 2.64 | 0.04 |
| Ube2u         | 2.64 | 0.04 |
| Aldh8a1       | 2.64 | 0.03 |
| Lrrc14b       | 2.63 | 0.02 |
| Cyp2d26       | 2.63 | 0.05 |
| Ghr           | 2.63 | 0.02 |
| Slc22a1       | 2.62 | 0.02 |
| Tmem254a      | 2.58 | 0.01 |
| Mapk15        | 2.58 | 0.03 |
| Fetub         | 2.57 | 0.05 |
| Pglyrp2       | 2.55 | 0.04 |
| Sult1b1       | 2.54 | 0.01 |

|          |      |      |
|----------|------|------|
| Pcp4l1   | 2.54 | 0.04 |
| Tymp     | 2.52 | 0.05 |
| Gm9992   | 2.51 | 0.04 |
| Cxcl9    | 2.51 | 0.04 |
| Insc     | 2.51 | 0.04 |
| Cyp51    | 2.51 | 0.04 |
| Gm36028  | 2.49 | 0.02 |
| Cyp3a25  | 2.49 | 0.02 |
| Nnmt     | 2.49 | 0.01 |
| Gcgr     | 2.49 | 0.02 |
| Apoc3    | 2.48 | 0.00 |
| Fdps     | 2.48 | 0.03 |
| Ugt1a2   | 2.46 | 0.01 |
| BC024139 | 2.45 | 0.04 |
| Pecr     | 2.45 | 0.05 |
| Ces2a    | 2.45 | 0.04 |
| Inca1    | 2.43 | 0.01 |
| Aass     | 2.42 | 0.05 |
| Pon1     | 2.42 | 0.01 |
| Ndrp2    | 2.40 | 0.05 |
| Nudt7    | 2.39 | 0.01 |
| Rdh16f1  | 2.39 | 0.03 |
| Tm7sf2   | 2.39 | 0.04 |
| Rdh16    | 2.37 | 0.03 |
| Cmb1     | 2.36 | 0.01 |
| Eif4ebp3 | 2.35 | 0.05 |
| Spp2     | 2.35 | 0.01 |
| Hmgcr    | 2.34 | 0.05 |
| Cyp2j5   | 2.33 | 0.04 |
| Ugt3a2   | 2.33 | 0.03 |
| Ugt2b5   | 2.32 | 0.03 |
| Gas1     | 2.32 | 0.05 |
| Mup21    | 2.32 | 0.03 |
| Asic5    | 2.30 | 0.03 |
| A2ml1    | 2.29 | 0.04 |
| Gcat     | 2.29 | 0.04 |

|          |      |      |
|----------|------|------|
| Abhd3    | 2.29 | 0.05 |
| Igf1     | 2.27 | 0.05 |
| Ptgds    | 2.26 | 0.03 |
| Mreg     | 2.25 | 0.03 |
| Acmsd    | 2.25 | 0.02 |
| Adh1     | 2.25 | 0.05 |
| Tlcd2    | 2.24 | 0.05 |
| Iigp1    | 2.24 | 0.05 |
| Clec2d   | 2.22 | 0.00 |
| Tuba8    | 2.22 | 0.05 |
| Car1     | 2.21 | 0.03 |
| Msmo1    | 2.21 | 0.03 |
| Chchd10  | 2.18 | 0.04 |
| Trim12a  | 2.17 | 0.03 |
| Asgr1    | 2.16 | 0.03 |
| Slc22a29 | 2.15 | 0.01 |
| Bbox1    | 2.13 | 0.05 |
| Mlxipl   | 2.13 | 0.04 |
| Serpina7 | 2.13 | 0.03 |
| Car8     | 2.13 | 0.02 |
| Zfand4   | 2.13 | 0.02 |
| Cyp27a1  | 2.12 | 0.05 |
| Mfsd4b3  | 2.11 | 0.04 |
| Mvd      | 2.10 | 0.05 |
| Sgk2     | 2.10 | 0.04 |
| Dcxr     | 2.08 | 0.04 |
| Crp      | 2.07 | 0.05 |
| Decr2    | 2.03 | 0.05 |
| Rarres2  | 2.02 | 0.01 |
| Cyp3a59  | 1.99 | 0.05 |
| Bcl6b    | 1.94 | 0.03 |
| Ccl5     | 1.94 | 0.04 |
| Tstd3    | 1.94 | 0.05 |
| Cd2      | 1.88 | 0.04 |
| Mmp13    | 1.86 | 0.05 |
| Thrsp    | 1.85 | 0.05 |

|               |      |      |
|---------------|------|------|
| Cfhr1         | 1.84 | 0.05 |
| Cth           | 1.83 | 0.04 |
| Ddt           | 1.82 | 0.02 |
| Gpx1          | 1.81 | 0.01 |
| Cd59b         | 1.77 | 0.03 |
| Mpv17l        | 1.72 | 0.02 |
| Rnase4        | 1.72 | 0.03 |
| Nit2          | 1.72 | 0.02 |
| BC025446      | 1.71 | 0.04 |
| Endog         | 1.68 | 0.04 |
| Tfpi2         | 1.66 | 0.04 |
| Akr1c6        | 1.66 | 0.04 |
| Tmem205       | 1.62 | 0.05 |
| Apoc4         | 1.38 | 0.03 |
| Leap2         | 1.36 | 0.04 |
| Gm5617        | 1.32 | 0.05 |
| Tmem256       | 1.25 | 0.02 |
| Ufc1          | 0.80 | 0.05 |
| Tmem60        | 0.75 | 0.05 |
| 2310009B15Rik | 0.74 | 0.05 |
| Med21         | 0.73 | 0.02 |
| Tsen15        | 0.73 | 0.05 |
| Elof1         | 0.73 | 0.05 |
| Churc1        | 0.73 | 0.01 |
| Psmg4         | 0.72 | 0.02 |
| Cox14         | 0.72 | 0.03 |
| Tma7          | 0.72 | 0.04 |
| Mrpl28        | 0.72 | 0.05 |
| Dbi           | 0.72 | 0.04 |
| Supt4a        | 0.71 | 0.03 |
| Lamtor5       | 0.71 | 0.05 |
| Trnau1ap      | 0.71 | 0.04 |
| Npm3          | 0.71 | 0.04 |
| Kbtbd3        | 0.71 | 0.05 |
| Fam96a        | 0.70 | 0.03 |
| Zfp873        | 0.70 | 0.03 |



|           |      |      |
|-----------|------|------|
| Orc4      | 0.70 | 0.04 |
| Bola2     | 0.70 | 0.01 |
| Tmem29    | 0.69 | 0.04 |
| Mrpl32    | 0.69 | 0.05 |
| Use1      | 0.69 | 0.03 |
| Sec61b    | 0.69 | 0.02 |
| Sumo1     | 0.69 | 0.03 |
| Chchd1    | 0.69 | 0.01 |
| Polr2k    | 0.69 | 0.04 |
| Rtraf     | 0.69 | 0.04 |
| Rpl36al   | 0.69 | 0.05 |
| Rps28     | 0.69 | 0.01 |
| Tomm5     | 0.68 | 0.04 |
| Rwdd1     | 0.68 | 0.04 |
| Arl1      | 0.68 | 0.05 |
| Yrdc      | 0.68 | 0.05 |
| Pts       | 0.68 | 0.01 |
| Sf3b6     | 0.68 | 0.03 |
| Sugt1     | 0.68 | 0.05 |
| Tbca      | 0.68 | 0.02 |
| Ndufaf5   | 0.68 | 0.04 |
| Elob      | 0.68 | 0.05 |
| Eef1akmt1 | 0.68 | 0.04 |
| Eif3i     | 0.68 | 0.03 |
| Fopnl     | 0.67 | 0.02 |
| Serf1     | 0.67 | 0.02 |
| Cox7a1    | 0.67 | 0.01 |
| Tpt1      | 0.67 | 0.04 |
| Rpl37a    | 0.67 | 0.01 |
| Tmem128   | 0.67 | 0.04 |
| Cox7a2l   | 0.67 | 0.02 |
| Gm7334    | 0.66 | 0.04 |
| Rpp21     | 0.66 | 0.03 |
| Nme2      | 0.66 | 0.01 |
| Bbip1     | 0.66 | 0.02 |
| Med30     | 0.66 | 0.04 |

|               |      |      |
|---------------|------|------|
| Btf3          | 0.66 | 0.03 |
| Rap1b         | 0.66 | 0.04 |
| Hsbp1         | 0.66 | 0.02 |
| Mrpl54        | 0.66 | 0.01 |
| Gnb4          | 0.66 | 0.03 |
| Naca          | 0.65 | 0.02 |
| Nudt2         | 0.65 | 0.04 |
| Eif2s2        | 0.65 | 0.04 |
| Gm14322       | 0.65 | 0.05 |
| Pigx          | 0.65 | 0.02 |
| Mrpl50        | 0.65 | 0.02 |
| Gm14391       | 0.65 | 0.03 |
| Gngt2         | 0.65 | 0.05 |
| Mrps28        | 0.65 | 0.03 |
| Naa20         | 0.65 | 0.02 |
| 9130409I23Rik | 0.65 | 0.04 |
| Lage3         | 0.64 | 0.02 |
| Dynlt1c       | 0.64 | 0.04 |
| Gm2026        | 0.64 | 0.03 |
| Glmn          | 0.64 | 0.05 |
| Rpl10-ps3     | 0.64 | 0.02 |
| Nhp2          | 0.64 | 0.03 |
| Ostc          | 0.64 | 0.01 |
| Rpl30         | 0.64 | 0.04 |
| Lsm7          | 0.64 | 0.04 |
| Pfdn1         | 0.64 | 0.02 |
| Gm32687       | 0.64 | 0.02 |
| Ggps1         | 0.64 | 0.05 |
| Rpl27-ps3     | 0.64 | 0.00 |
| Rpl41         | 0.63 | 0.00 |
| Cops4         | 0.63 | 0.03 |
| Sptssa        | 0.63 | 0.02 |
| Ran           | 0.63 | 0.02 |
| Dhps          | 0.63 | 0.04 |
| 1810037I17Rik | 0.63 | 0.01 |
| Glrx3         | 0.63 | 0.01 |

|           |      |      |
|-----------|------|------|
| Nbdy      | 0.63 | 0.05 |
| Jmjd7     | 0.63 | 0.05 |
| Nup37     | 0.63 | 0.05 |
| Ppp2r3c   | 0.63 | 0.03 |
| Tmem37    | 0.63 | 0.05 |
| Eif3m     | 0.63 | 0.01 |
| Aimp1     | 0.62 | 0.02 |
| Fau       | 0.62 | 0.01 |
| Anapc10   | 0.62 | 0.02 |
| Commd8    | 0.62 | 0.04 |
| Pole3     | 0.62 | 0.05 |
| Ssr4      | 0.62 | 0.01 |
| S100a10   | 0.62 | 0.01 |
| Polr2e    | 0.62 | 0.05 |
| Rpl27     | 0.62 | 0.00 |
| Setmar    | 0.62 | 0.05 |
| 43345     | 0.62 | 0.05 |
| Magohb    | 0.62 | 0.03 |
| Magoh     | 0.62 | 0.02 |
| Gm14434   | 0.62 | 0.01 |
| Gm9843    | 0.62 | 0.01 |
| Gm14326   | 0.61 | 0.01 |
| Mzt1      | 0.61 | 0.02 |
| Coq6      | 0.61 | 0.04 |
| Gm10073   | 0.61 | 0.03 |
| Hspb11    | 0.61 | 0.01 |
| Snrpd2    | 0.61 | 0.03 |
| Eef1akmt2 | 0.61 | 0.05 |
| Gm3055    | 0.61 | 0.03 |
| Cetn3     | 0.61 | 0.02 |
| Tceanc    | 0.61 | 0.02 |
| Zfp950    | 0.61 | 0.05 |
| Ccdc125   | 0.61 | 0.05 |
| Gng11     | 0.61 | 0.01 |
| Zfp960    | 0.61 | 0.01 |
| Clk1      | 0.61 | 0.04 |

|               |      |      |
|---------------|------|------|
| Ten1          | 0.61 | 0.03 |
| Rbp1          | 0.61 | 0.03 |
| Phpt1         | 0.61 | 0.02 |
| Chrac1        | 0.61 | 0.02 |
| Selenof       | 0.61 | 0.01 |
| Slc51b        | 0.61 | 0.04 |
| Zfp958        | 0.61 | 0.02 |
| Stard3nl      | 0.61 | 0.01 |
| Sec22a        | 0.61 | 0.03 |
| Eif3h         | 0.61 | 0.01 |
| Rpl37         | 0.60 | 0.00 |
| Batf          | 0.60 | 0.03 |
| Mcrip1        | 0.60 | 0.04 |
| Fkbp7         | 0.60 | 0.04 |
| Rpl27a        | 0.60 | 0.00 |
| Dclre1a       | 0.60 | 0.05 |
| Fancc         | 0.60 | 0.03 |
| Hist1h4i      | 0.60 | 0.03 |
| Fundc2        | 0.60 | 0.01 |
| Sec61g        | 0.60 | 0.00 |
| 1110059E24Rik | 0.60 | 0.01 |
| Rpl18         | 0.60 | 0.03 |
| Rps29         | 0.60 | 0.02 |
| Rpl23a        | 0.60 | 0.02 |
| Zfp97         | 0.60 | 0.01 |
| Fancl         | 0.60 | 0.02 |
| Pycard        | 0.60 | 0.04 |
| Eef1e1        | 0.60 | 0.01 |
| Cyba          | 0.60 | 0.02 |
| Hbb-bs        | 0.60 | 0.02 |
| Myl6          | 0.60 | 0.04 |
| Hist1h4c      | 0.59 | 0.01 |
| Gm14325       | 0.59 | 0.02 |
| Fastkd3       | 0.59 | 0.01 |
| Setd4         | 0.59 | 0.04 |
| Gm14295       | 0.59 | 0.03 |

|               |      |      |
|---------------|------|------|
| Lyrn4         | 0.59 | 0.02 |
| Znhit3        | 0.59 | 0.00 |
| Cd84          | 0.59 | 0.05 |
| Ppia          | 0.59 | 0.01 |
| Zfp810        | 0.59 | 0.05 |
| Wdr89         | 0.59 | 0.02 |
| Zfp712        | 0.59 | 0.05 |
| Gtf2a2        | 0.59 | 0.00 |
| Tiparp        | 0.59 | 0.04 |
| 43350         | 0.59 | 0.05 |
| Rpl11         | 0.59 | 0.01 |
| Rps21         | 0.59 | 0.00 |
| Fabp4         | 0.59 | 0.03 |
| Hprt          | 0.59 | 0.01 |
| Fcgr4         | 0.59 | 0.03 |
| Cd300a        | 0.59 | 0.05 |
| Rps17         | 0.59 | 0.00 |
| Med6          | 0.59 | 0.01 |
| Zfp458        | 0.59 | 0.05 |
| Hscb          | 0.59 | 0.00 |
| Cd52          | 0.59 | 0.01 |
| Cyb5r1        | 0.59 | 0.05 |
| Rsl24d1       | 0.59 | 0.04 |
| D030056L22Rik | 0.59 | 0.03 |
| Gm14305       | 0.58 | 0.02 |
| Nsmce1        | 0.58 | 0.01 |
| 4921524J17Rik | 0.58 | 0.03 |
| Pfdn5         | 0.58 | 0.00 |
| Cenpl         | 0.58 | 0.04 |
| Aif1          | 0.58 | 0.05 |
| Pigf          | 0.58 | 0.01 |
| Tceal8        | 0.58 | 0.05 |
| Nudt14        | 0.58 | 0.03 |
| Sergef        | 0.58 | 0.04 |
| Rps26         | 0.58 | 0.01 |
| Haus3         | 0.58 | 0.04 |

|         |      |      |
|---------|------|------|
| Zfp433  | 0.58 | 0.03 |
| Rplp1   | 0.58 | 0.02 |
| Zfp277  | 0.58 | 0.03 |
| Tmem159 | 0.58 | 0.04 |
| Rplp2   | 0.58 | 0.02 |
| Cd86    | 0.58 | 0.02 |
| Gm527   | 0.58 | 0.03 |
| Rpl8    | 0.58 | 0.01 |
| H2afv   | 0.58 | 0.01 |
| Ccdc107 | 0.58 | 0.00 |
| Cd48    | 0.58 | 0.03 |
| Dut     | 0.58 | 0.02 |
| Rpl36a  | 0.58 | 0.02 |
| Mageh1  | 0.58 | 0.05 |
| Tpd52l2 | 0.58 | 0.04 |
| Cep57   | 0.57 | 0.05 |
| Lpxn    | 0.57 | 0.05 |
| Glt8d1  | 0.57 | 0.05 |
| Psm8    | 0.57 | 0.05 |
| Thoc7   | 0.57 | 0.00 |
| Bcl10   | 0.57 | 0.04 |
| Aim2    | 0.57 | 0.02 |
| Spata24 | 0.57 | 0.04 |
| Rpl35a  | 0.57 | 0.01 |
| Rpl24   | 0.57 | 0.04 |
| Orc2    | 0.57 | 0.04 |
| Fkbp14  | 0.57 | 0.05 |
| Pnrc2   | 0.57 | 0.03 |
| Polr2h  | 0.57 | 0.01 |
| Rpsa    | 0.57 | 0.01 |
| Nudt19  | 0.57 | 0.03 |
| Gyg     | 0.57 | 0.05 |
| Slamf9  | 0.57 | 0.05 |
| Rpl7    | 0.57 | 0.01 |
| Scai    | 0.57 | 0.03 |
| Zfp991  | 0.57 | 0.04 |

|               |      |      |
|---------------|------|------|
| Rplp0         | 0.57 | 0.01 |
| 3110009E18Rik | 0.57 | 0.00 |
| Cuedc2        | 0.57 | 0.02 |
| Inmt          | 0.56 | 0.05 |
| Cdkn2aipnl    | 0.56 | 0.03 |
| Rpl19         | 0.56 | 0.00 |
| Rpa3          | 0.56 | 0.00 |
| Rps27rt       | 0.56 | 0.00 |
| Zfp867        | 0.56 | 0.01 |
| Mrpl33        | 0.56 | 0.01 |
| Rpl36         | 0.56 | 0.00 |
| Vbp1          | 0.56 | 0.01 |
| Chchd6        | 0.56 | 0.01 |
| Snx7          | 0.56 | 0.04 |
| Gtf3a         | 0.56 | 0.02 |
| Rpl7a         | 0.56 | 0.01 |
| Rps23         | 0.56 | 0.00 |
| Gm2004        | 0.56 | 0.05 |
| Erich1        | 0.56 | 0.04 |
| Pdcd10        | 0.56 | 0.01 |
| 2410002F23Rik | 0.56 | 0.05 |
| Hmgn1         | 0.56 | 0.03 |
| Ccdc126       | 0.56 | 0.01 |
| Mthfd2        | 0.56 | 0.05 |
| Hist1h1e      | 0.56 | 0.05 |
| B9d2          | 0.56 | 0.01 |
| AU041133      | 0.56 | 0.05 |
| Commd2        | 0.56 | 0.01 |
| Fhit          | 0.56 | 0.05 |
| Prpf38a       | 0.56 | 0.02 |
| Fam111a       | 0.56 | 0.04 |
| Rfc5          | 0.56 | 0.04 |
| Gm10131       | 0.56 | 0.00 |
| Fkbp3         | 0.56 | 0.01 |
| Tfec          | 0.56 | 0.03 |
| Birc2         | 0.56 | 0.05 |

|               |      |      |
|---------------|------|------|
| Rps27         | 0.56 | 0.00 |
| Fcer1g        | 0.56 | 0.05 |
| Gm10036       | 0.55 | 0.01 |
| Gm14308       | 0.55 | 0.00 |
| Cby1          | 0.55 | 0.04 |
| Rps5          | 0.55 | 0.01 |
| Snrnp25       | 0.55 | 0.02 |
| Atpif1        | 0.55 | 0.01 |
| Clec4a3       | 0.55 | 0.03 |
| Rpl26         | 0.55 | 0.00 |
| Srsf7         | 0.55 | 0.03 |
| Rps3a1        | 0.55 | 0.00 |
| Fis1          | 0.55 | 0.01 |
| Pfdn4         | 0.55 | 0.01 |
| Calm2         | 0.55 | 0.05 |
| Rps15         | 0.55 | 0.00 |
| Cd9           | 0.55 | 0.04 |
| Rpl38         | 0.55 | 0.00 |
| Cep78         | 0.55 | 0.04 |
| Rpl13         | 0.55 | 0.01 |
| Prdx2         | 0.55 | 0.01 |
| Nap111        | 0.55 | 0.05 |
| Rab39         | 0.54 | 0.01 |
| Nudcd2        | 0.54 | 0.00 |
| Pla2g4a       | 0.54 | 0.03 |
| Med11         | 0.54 | 0.00 |
| Gm10260       | 0.54 | 0.00 |
| Adgre4        | 0.54 | 0.04 |
| C330021F23Rik | 0.54 | 0.01 |
| Zfp951        | 0.54 | 0.04 |
| Hey1          | 0.54 | 0.02 |
| Sap30         | 0.54 | 0.05 |
| Mri1          | 0.54 | 0.04 |
| Guca1a        | 0.54 | 0.01 |
| Zfp52         | 0.54 | 0.02 |
| Snrpd1        | 0.54 | 0.01 |



|               |      |      |
|---------------|------|------|
| 2200002D01Rik | 0.54 | 0.03 |
| Faap24        | 0.54 | 0.03 |
| Fam49b        | 0.54 | 0.05 |
| Ints6l        | 0.54 | 0.04 |
| Zfp189        | 0.54 | 0.05 |
| Ecscr         | 0.54 | 0.03 |
| Cmss1         | 0.54 | 0.02 |
| Ada           | 0.54 | 0.04 |
| Tomm20        | 0.54 | 0.00 |
| Rpl13a        | 0.54 | 0.00 |
| Gm8186        | 0.54 | 0.00 |
| Snx5          | 0.54 | 0.02 |
| Gimd1         | 0.53 | 0.01 |
| Slfn2         | 0.53 | 0.01 |
| Cks2          | 0.53 | 0.00 |
| Txndc12       | 0.53 | 0.05 |
| Trim13        | 0.53 | 0.03 |
| Aoah          | 0.53 | 0.03 |
| Pop4          | 0.53 | 0.04 |
| Cdc16         | 0.53 | 0.04 |
| Lamtor3       | 0.53 | 0.01 |
| Gm6133        | 0.53 | 0.00 |
| Nabp1         | 0.53 | 0.05 |
| Pms1          | 0.53 | 0.04 |
| Gm29394       | 0.53 | 0.03 |
| Tmem165       | 0.53 | 0.05 |
| Plp1          | 0.53 | 0.02 |
| Mfsd10        | 0.53 | 0.05 |
| Gm14419       | 0.53 | 0.03 |
| Cd80          | 0.53 | 0.05 |
| 1810011H11Rik | 0.53 | 0.03 |
| Epsti1        | 0.53 | 0.02 |
| Rps4x         | 0.53 | 0.01 |
| Ncf4          | 0.53 | 0.05 |
| Rps3          | 0.53 | 0.00 |
| Mal2          | 0.53 | 0.02 |

|            |      |      |
|------------|------|------|
| Slc25a14   | 0.53 | 0.00 |
| Hist1h4h   | 0.53 | 0.02 |
| Nipsnap2   | 0.53 | 0.02 |
| Rps13      | 0.53 | 0.00 |
| Rps20      | 0.53 | 0.01 |
| Tlr13      | 0.53 | 0.04 |
| Il1b       | 0.53 | 0.02 |
| Dnajc9     | 0.53 | 0.03 |
| Tra2a      | 0.52 | 0.04 |
| Tes        | 0.52 | 0.05 |
| Cfap69     | 0.52 | 0.03 |
| Gng10      | 0.52 | 0.00 |
| Ikbip      | 0.52 | 0.03 |
| Nup43      | 0.52 | 0.02 |
| Fgf21      | 0.52 | 0.03 |
| Cdk7       | 0.52 | 0.01 |
| Golt1b     | 0.52 | 0.02 |
| Rps6       | 0.52 | 0.00 |
| Ppih       | 0.52 | 0.00 |
| Clic1      | 0.52 | 0.04 |
| Btbd3      | 0.52 | 0.05 |
| Med31      | 0.52 | 0.00 |
| Tpm4       | 0.52 | 0.04 |
| Rps11      | 0.52 | 0.00 |
| Mctp1      | 0.52 | 0.02 |
| Rpl5       | 0.52 | 0.00 |
| Rps9       | 0.52 | 0.00 |
| Srsf3      | 0.52 | 0.01 |
| Rpl36a-ps1 | 0.52 | 0.00 |
| Hist1h1c   | 0.52 | 0.03 |
| Gm12355    | 0.52 | 0.02 |
| C1qa       | 0.51 | 0.05 |
| Snrpg      | 0.51 | 0.00 |
| Wfdc17     | 0.51 | 0.01 |
| Ifi27l2a   | 0.51 | 0.00 |
| Ccdc80     | 0.51 | 0.03 |

|         |      |      |
|---------|------|------|
| Bcl2a1b | 0.51 | 0.04 |
| Erh     | 0.51 | 0.00 |
| Lpcat4  | 0.51 | 0.05 |
| Rps14   | 0.51 | 0.00 |
| Plac8   | 0.51 | 0.05 |
| Zfp658  | 0.51 | 0.03 |
| Rpl34   | 0.51 | 0.00 |
| Pot1b   | 0.51 | 0.04 |
| Reep5   | 0.51 | 0.03 |
| Ifrd1   | 0.51 | 0.02 |
| Tspan4  | 0.51 | 0.04 |
| Klhl23  | 0.51 | 0.02 |
| Mdm1    | 0.51 | 0.04 |
| Camk1   | 0.51 | 0.03 |
| Lym9    | 0.51 | 0.03 |
| Dtymk   | 0.51 | 0.01 |
| Rpl6    | 0.51 | 0.00 |
| Pim3    | 0.50 | 0.05 |
| Slc35g2 | 0.50 | 0.01 |
| Rpl10a  | 0.50 | 0.00 |
| Zfp566  | 0.50 | 0.03 |
| Gm11361 | 0.50 | 0.00 |
| Cryl1   | 0.50 | 0.03 |
| Lsm5    | 0.50 | 0.00 |
| Rpl17   | 0.50 | 0.00 |
| Rps10   | 0.50 | 0.01 |
| Anxa1   | 0.50 | 0.03 |
| Zfp9    | 0.50 | 0.01 |
| Arrdc1  | 0.50 | 0.05 |
| Mybl1   | 0.50 | 0.01 |
| Cd14    | 0.50 | 0.05 |
| Igsf6   | 0.50 | 0.01 |
| Lat2    | 0.50 | 0.04 |
| Cdca4   | 0.50 | 0.02 |
| Lsm3    | 0.50 | 0.01 |
| Kitl    | 0.50 | 0.05 |

|               |      |      |
|---------------|------|------|
| Pik3c2a       | 0.50 | 0.04 |
| Fam118a       | 0.50 | 0.01 |
| Dck           | 0.50 | 0.03 |
| Rpl14         | 0.50 | 0.00 |
| Nlrp3         | 0.50 | 0.05 |
| C1qb          | 0.50 | 0.04 |
| Rps16         | 0.49 | 0.00 |
| Rbl1          | 0.49 | 0.03 |
| Tmem237       | 0.49 | 0.03 |
| Lins1         | 0.49 | 0.03 |
| Sass6         | 0.49 | 0.05 |
| Bst1          | 0.49 | 0.03 |
| Cenpc1        | 0.49 | 0.04 |
| I830077J02Rik | 0.49 | 0.03 |
| Pcna          | 0.49 | 0.01 |
| Prdx5         | 0.49 | 0.01 |
| Qpct          | 0.49 | 0.04 |
| Lsm4          | 0.49 | 0.01 |
| Gemin7        | 0.49 | 0.01 |
| C1qc          | 0.49 | 0.05 |
| Twf2          | 0.49 | 0.05 |
| Rab2b         | 0.49 | 0.02 |
| Npm1          | 0.49 | 0.01 |
| Apex2         | 0.49 | 0.04 |
| Lyz1          | 0.49 | 0.01 |
| Tdrp          | 0.49 | 0.04 |
| Exoc6         | 0.49 | 0.03 |
| Tipin         | 0.49 | 0.03 |
| Rps27a        | 0.49 | 0.00 |
| Cd207         | 0.49 | 0.01 |
| Pcna-ps2      | 0.49 | 0.01 |
| Snx20         | 0.49 | 0.05 |
| Tmem17        | 0.49 | 0.00 |
| Mnat1         | 0.49 | 0.02 |
| Tctex1d2      | 0.49 | 0.03 |
| Rps15a        | 0.49 | 0.00 |

|               |      |      |
|---------------|------|------|
| Fam105a       | 0.48 | 0.01 |
| Rps18         | 0.48 | 0.00 |
| Oxct1         | 0.48 | 0.04 |
| Tsc22d3       | 0.48 | 0.03 |
| Mllt11        | 0.48 | 0.05 |
| Zfp322a       | 0.48 | 0.01 |
| Hist3h2a      | 0.48 | 0.01 |
| Rdm1          | 0.48 | 0.01 |
| Eri2          | 0.48 | 0.02 |
| BC147527      | 0.48 | 0.01 |
| Eef1b2        | 0.48 | 0.00 |
| Gmnn          | 0.48 | 0.00 |
| Nt5c3b        | 0.48 | 0.01 |
| Sgcb          | 0.48 | 0.04 |
| Ggh           | 0.48 | 0.00 |
| Zfp449        | 0.48 | 0.03 |
| Topbp1        | 0.48 | 0.04 |
| Rhobtb3       | 0.48 | 0.05 |
| Derl3         | 0.48 | 0.03 |
| Zfp40         | 0.48 | 0.01 |
| Snrpe         | 0.48 | 0.00 |
| Lyz2          | 0.48 | 0.01 |
| Rpl9          | 0.48 | 0.00 |
| 1810032O08Rik | 0.48 | 0.00 |
| Rpl31         | 0.48 | 0.00 |
| Spa17         | 0.48 | 0.05 |
| Dynlt1a       | 0.48 | 0.00 |
| 43160         | 0.48 | 0.04 |
| Ctss          | 0.48 | 0.03 |
| Ubtd2         | 0.48 | 0.04 |
| Klh6          | 0.48 | 0.04 |
| Gpx8          | 0.48 | 0.00 |
| Tk1           | 0.48 | 0.03 |
| Crip1         | 0.47 | 0.01 |
| Miip          | 0.47 | 0.04 |
| Zfp808        | 0.47 | 0.02 |

|          |      |      |
|----------|------|------|
| Hyls1    | 0.47 | 0.01 |
| Plek2    | 0.47 | 0.03 |
| Cav1     | 0.47 | 0.05 |
| Acot1    | 0.47 | 0.03 |
| Tusc3    | 0.47 | 0.02 |
| Clec4n   | 0.47 | 0.02 |
| Rpl15    | 0.47 | 0.00 |
| Mgat4a   | 0.47 | 0.05 |
| Bag2     | 0.47 | 0.02 |
| Bzw2     | 0.47 | 0.03 |
| Zfp934   | 0.47 | 0.01 |
| Arl6     | 0.47 | 0.04 |
| Gm9493   | 0.47 | 0.00 |
| Apold1   | 0.47 | 0.04 |
| Prmt1    | 0.47 | 0.05 |
| Tyrobp   | 0.47 | 0.00 |
| Haus1    | 0.47 | 0.00 |
| Bcl2a1d  | 0.47 | 0.01 |
| Nme4     | 0.47 | 0.01 |
| Lrmp     | 0.47 | 0.05 |
| Gm33543  | 0.47 | 0.03 |
| Wsb1     | 0.47 | 0.02 |
| Rpl3     | 0.47 | 0.00 |
| Rpl9-ps6 | 0.47 | 0.00 |
| Tax1bp3  | 0.47 | 0.02 |
| Nenf     | 0.47 | 0.00 |
| Hgf      | 0.47 | 0.05 |
| Mis18a   | 0.47 | 0.02 |
| Rpl35    | 0.47 | 0.00 |
| Rbbp8    | 0.47 | 0.03 |
| Ankrd49  | 0.47 | 0.01 |
| Tuba1a   | 0.47 | 0.04 |
| Rps24    | 0.47 | 0.00 |
| Gnb1l    | 0.47 | 0.04 |
| Platr25  | 0.47 | 0.01 |
| Rps7     | 0.46 | 0.00 |

|          |      |      |
|----------|------|------|
| Npl      | 0.46 | 0.03 |
| Siva1    | 0.46 | 0.01 |
| Rpl39    | 0.46 | 0.00 |
| Ndc1     | 0.46 | 0.05 |
| Hddc2    | 0.46 | 0.01 |
| Bambi    | 0.46 | 0.02 |
| Aoc2     | 0.46 | 0.04 |
| Ifngr1   | 0.46 | 0.04 |
| Gdpd3    | 0.46 | 0.03 |
| Fam171b  | 0.46 | 0.03 |
| Taf1d    | 0.46 | 0.00 |
| Hspbap1  | 0.46 | 0.03 |
| Gm2000   | 0.46 | 0.00 |
| Aph1c    | 0.46 | 0.02 |
| Hat1     | 0.46 | 0.01 |
| Ncf2     | 0.46 | 0.04 |
| Naip5    | 0.46 | 0.03 |
| Tuba1b   | 0.46 | 0.04 |
| Sgce     | 0.46 | 0.03 |
| Arhgap15 | 0.46 | 0.01 |
| Ncoa7    | 0.46 | 0.03 |
| Gins1    | 0.46 | 0.02 |
| Rfc3     | 0.46 | 0.00 |
| Atad5    | 0.46 | 0.04 |
| Cd300c2  | 0.46 | 0.01 |
| Rps8     | 0.46 | 0.00 |
| Emb      | 0.46 | 0.05 |
| Unc119   | 0.46 | 0.04 |
| Gen1     | 0.46 | 0.02 |
| Spire1   | 0.46 | 0.05 |
| Tspan3   | 0.46 | 0.05 |
| Naip6    | 0.45 | 0.03 |
| Panx1    | 0.45 | 0.05 |
| Rpl32    | 0.45 | 0.00 |
| Hamp     | 0.45 | 0.03 |
| P2ry12   | 0.45 | 0.01 |

|               |      |      |
|---------------|------|------|
| Zc2hc1c       | 0.45 | 0.05 |
| Ell3          | 0.45 | 0.01 |
| Gm11007       | 0.45 | 0.02 |
| Rpp38         | 0.45 | 0.00 |
| 1500011B03Rik | 0.45 | 0.00 |
| AB124611      | 0.45 | 0.01 |
| Pak1          | 0.45 | 0.05 |
| Psph          | 0.45 | 0.01 |
| Tnfaip8       | 0.45 | 0.01 |
| Ear2          | 0.45 | 0.02 |
| Gmfg          | 0.45 | 0.00 |
| Rgs2          | 0.45 | 0.01 |
| Vsig10l       | 0.45 | 0.04 |
| Zfp90         | 0.45 | 0.03 |
| Cd300lf       | 0.45 | 0.05 |
| Zfp821        | 0.45 | 0.04 |
| Gm10269       | 0.45 | 0.00 |
| Ngf           | 0.45 | 0.03 |
| Fam216a       | 0.45 | 0.01 |
| Tlr8          | 0.45 | 0.04 |
| Rnaseh2b      | 0.45 | 0.01 |
| Cytip         | 0.45 | 0.01 |
| Tyms          | 0.45 | 0.02 |
| Ccdc77        | 0.45 | 0.02 |
| Klh13         | 0.45 | 0.05 |
| Gm5141        | 0.45 | 0.05 |
| Odc1          | 0.44 | 0.01 |
| Lair1         | 0.44 | 0.01 |
| Acot9         | 0.44 | 0.00 |
| Ptpn18        | 0.44 | 0.01 |
| Rcan1         | 0.44 | 0.03 |
| E2f2          | 0.44 | 0.05 |
| Fpr1          | 0.44 | 0.02 |
| Jazf1         | 0.44 | 0.04 |
| Ltc4s         | 0.44 | 0.02 |
| Ezh2          | 0.44 | 0.05 |



|          |      |      |
|----------|------|------|
| Brip1    | 0.44 | 0.05 |
| Mrps6    | 0.44 | 0.00 |
| Nemp2    | 0.44 | 0.05 |
| Msh5     | 0.44 | 0.01 |
| Sectm1a  | 0.44 | 0.03 |
| Adgb     | 0.44 | 0.03 |
| Ulbp1    | 0.44 | 0.05 |
| Micu3    | 0.44 | 0.02 |
| Trim7    | 0.44 | 0.05 |
| Myl12b   | 0.44 | 0.04 |
| Dok3     | 0.44 | 0.03 |
| H3f3a    | 0.44 | 0.02 |
| Skp2     | 0.44 | 0.02 |
| Sparc    | 0.44 | 0.05 |
| Ppic     | 0.44 | 0.00 |
| Adgrl3   | 0.44 | 0.05 |
| Ccdc102a | 0.44 | 0.05 |
| Sh3bgrl3 | 0.44 | 0.05 |
| Eci2     | 0.44 | 0.01 |
| Fam72a   | 0.44 | 0.01 |
| Htra2    | 0.44 | 0.04 |
| Cklf     | 0.44 | 0.00 |
| Tceal9   | 0.44 | 0.00 |
| Ctnnbip1 | 0.44 | 0.04 |
| Cpt1c    | 0.44 | 0.04 |
| Stx1a    | 0.44 | 0.05 |
| BC028528 | 0.44 | 0.00 |
| Trpc1    | 0.43 | 0.03 |
| Ift43    | 0.43 | 0.04 |
| Smim6    | 0.43 | 0.01 |
| Dok2     | 0.43 | 0.02 |
| Tmem191c | 0.43 | 0.05 |
| H2-Q1    | 0.43 | 0.04 |
| Gm28285  | 0.43 | 0.00 |
| Rnaseh2a | 0.43 | 0.02 |
| Mindy4   | 0.43 | 0.04 |

|           |      |      |
|-----------|------|------|
| Rps19     | 0.43 | 0.00 |
| Rhebl1    | 0.43 | 0.04 |
| Nop58     | 0.43 | 0.05 |
| Tmsb15l   | 0.43 | 0.00 |
| Abcc5     | 0.43 | 0.04 |
| Sccpdh    | 0.43 | 0.01 |
| Pld4      | 0.43 | 0.05 |
| Plin4     | 0.43 | 0.05 |
| Clec10a   | 0.43 | 0.01 |
| Serpina3i | 0.43 | 0.04 |
| Dynll1    | 0.43 | 0.02 |
| Pla2g12a  | 0.43 | 0.03 |
| Dse       | 0.43 | 0.02 |
| Cep128    | 0.42 | 0.05 |
| Dynlt1f   | 0.42 | 0.00 |
| Ii18rap   | 0.42 | 0.03 |
| Ms4a6d    | 0.42 | 0.00 |
| Nrep      | 0.42 | 0.01 |
| Myc       | 0.42 | 0.04 |
| Ctsk      | 0.42 | 0.02 |
| Flywch2   | 0.42 | 0.00 |
| Slc25a43  | 0.42 | 0.05 |
| C1qtnf12  | 0.42 | 0.00 |
| B9d1      | 0.42 | 0.01 |
| Ube2s     | 0.42 | 0.01 |
| Zfp697    | 0.42 | 0.02 |
| Ly6d      | 0.42 | 0.02 |
| Prim1     | 0.42 | 0.00 |
| Tm4sf4    | 0.42 | 0.01 |
| Ntpcr     | 0.42 | 0.01 |
| Mtbp      | 0.42 | 0.01 |
| Klhdc8b   | 0.42 | 0.05 |
| Pdgfc     | 0.42 | 0.05 |
| Sertad1   | 0.42 | 0.01 |
| Fam102b   | 0.42 | 0.04 |
| Fabp7     | 0.41 | 0.01 |

|               |      |      |
|---------------|------|------|
| Ccdc68        | 0.41 | 0.01 |
| Mcm7          | 0.41 | 0.03 |
| Tagap         | 0.41 | 0.03 |
| Dusp4         | 0.41 | 0.05 |
| Hist1h4m      | 0.41 | 0.00 |
| Tspan17       | 0.41 | 0.05 |
| Cysltr1       | 0.41 | 0.01 |
| Rack1         | 0.41 | 0.00 |
| Nmb           | 0.41 | 0.02 |
| Rnf180        | 0.41 | 0.04 |
| Cr2           | 0.41 | 0.02 |
| Ly86          | 0.41 | 0.01 |
| Maged2        | 0.41 | 0.02 |
| Klf10         | 0.41 | 0.02 |
| Rgs10         | 0.41 | 0.00 |
| Trem2         | 0.41 | 0.01 |
| Il33          | 0.41 | 0.03 |
| Mycn          | 0.41 | 0.03 |
| Mcm8          | 0.41 | 0.01 |
| Sfxn1         | 0.41 | 0.03 |
| Cebpd         | 0.41 | 0.01 |
| Ap1s2         | 0.41 | 0.01 |
| Pthr1         | 0.41 | 0.02 |
| Fcgr1         | 0.41 | 0.03 |
| Fam60a        | 0.40 | 0.01 |
| Rps25         | 0.40 | 0.05 |
| 1810062G17Rik | 0.40 | 0.00 |
| Smarcd3       | 0.40 | 0.05 |
| Cdkn2d        | 0.40 | 0.01 |
| Cpeb1         | 0.40 | 0.04 |
| Ccdc14        | 0.40 | 0.05 |
| Lrrc75a       | 0.40 | 0.03 |
| Orc6          | 0.40 | 0.00 |
| Rgs1          | 0.40 | 0.01 |
| Cav2          | 0.40 | 0.00 |
| Card9         | 0.40 | 0.04 |

|           |      |      |
|-----------|------|------|
| Rapgef1l  | 0.40 | 0.03 |
| Raet1e    | 0.40 | 0.03 |
| Pcolce2   | 0.40 | 0.04 |
| Tmsb4x    | 0.40 | 0.00 |
| Tef       | 0.40 | 0.03 |
| Rras2     | 0.40 | 0.03 |
| Ptpro     | 0.40 | 0.03 |
| Vrk1      | 0.40 | 0.02 |
| Smc4      | 0.40 | 0.02 |
| Prim2     | 0.40 | 0.02 |
| Sla       | 0.40 | 0.01 |
| Zdhhc2    | 0.40 | 0.02 |
| Rpl12     | 0.39 | 0.00 |
| Sirpb1b   | 0.39 | 0.00 |
| Moap1     | 0.39 | 0.02 |
| Fhl2      | 0.39 | 0.05 |
| Rps12-ps3 | 0.39 | 0.00 |
| Cd63      | 0.39 | 0.02 |
| B3glct    | 0.39 | 0.04 |
| Fgd2      | 0.39 | 0.02 |
| Smo       | 0.39 | 0.05 |
| Rfc4      | 0.39 | 0.00 |
| Tmem229a  | 0.39 | 0.05 |
| Slc22a17  | 0.39 | 0.02 |
| Cep72     | 0.39 | 0.04 |
| Sgk1      | 0.39 | 0.01 |
| Rrp1b     | 0.39 | 0.03 |
| Lpcat2    | 0.39 | 0.02 |
| Edn1      | 0.39 | 0.04 |
| Arl11     | 0.39 | 0.02 |
| Rps12     | 0.39 | 0.00 |
| Il1r1     | 0.39 | 0.02 |
| Nrip2     | 0.38 | 0.03 |
| Dab1      | 0.38 | 0.04 |
| Rab34     | 0.38 | 0.02 |
| Xlr       | 0.38 | 0.00 |

|               |      |      |
|---------------|------|------|
| Rem1          | 0.38 | 0.04 |
| Cavin2        | 0.38 | 0.03 |
| Abca9         | 0.38 | 0.04 |
| Adamts12      | 0.38 | 0.04 |
| Tube1         | 0.38 | 0.03 |
| Ncf1          | 0.38 | 0.05 |
| Gpx7          | 0.38 | 0.01 |
| Nradd         | 0.38 | 0.04 |
| D130040H23Rik | 0.38 | 0.01 |
| Atad2         | 0.38 | 0.02 |
| P2rx5         | 0.38 | 0.03 |
| Galk1         | 0.38 | 0.01 |
| Camk2b        | 0.38 | 0.05 |
| Lum           | 0.38 | 0.05 |
| Hmgn2         | 0.38 | 0.01 |
| Bcl2a1a       | 0.38 | 0.00 |
| Fkbp10        | 0.38 | 0.04 |
| Ms4a6b        | 0.38 | 0.00 |
| Tnfrsf12a     | 0.38 | 0.00 |
| Spry1         | 0.38 | 0.04 |
| Hist2h4       | 0.37 | 0.00 |
| Myo7a         | 0.37 | 0.04 |
| Lhx6          | 0.37 | 0.05 |
| Ccl2          | 0.37 | 0.04 |
| Mcf2l         | 0.37 | 0.04 |
| Clec4a2       | 0.37 | 0.00 |
| Rundc3b       | 0.37 | 0.01 |
| Zfr2          | 0.37 | 0.04 |
| Per3          | 0.37 | 0.03 |
| BC016579      | 0.37 | 0.01 |
| Pkn3          | 0.37 | 0.04 |
| Ms4a4c        | 0.37 | 0.01 |
| Rrm1          | 0.37 | 0.04 |
| Clca3a1       | 0.37 | 0.01 |
| Txnip         | 0.37 | 0.03 |
| Serpnb6b      | 0.37 | 0.02 |

|           |      |      |
|-----------|------|------|
| Preld2    | 0.37 | 0.00 |
| Nrg1      | 0.37 | 0.04 |
| H2afz     | 0.37 | 0.00 |
| 43349     | 0.37 | 0.04 |
| Tmem41a   | 0.37 | 0.02 |
| Klra2     | 0.37 | 0.00 |
| Gfra2     | 0.37 | 0.03 |
| Cdc25b    | 0.37 | 0.05 |
| Pdk3      | 0.37 | 0.02 |
| Rab31     | 0.37 | 0.02 |
| Rpl22l1   | 0.37 | 0.00 |
| Pck2      | 0.37 | 0.04 |
| Wdhd1     | 0.37 | 0.01 |
| Ctla2b    | 0.36 | 0.00 |
| Papss1    | 0.36 | 0.04 |
| Hist3h2ba | 0.36 | 0.03 |
| Gpsm1     | 0.36 | 0.03 |
| Cdkn1a    | 0.36 | 0.05 |
| Mcub      | 0.36 | 0.04 |
| Pdlim2    | 0.36 | 0.01 |
| Peg3      | 0.36 | 0.03 |
| Tmsb10    | 0.36 | 0.00 |
| Bcl2      | 0.36 | 0.03 |
| Pole2     | 0.36 | 0.00 |
| Dbf4      | 0.36 | 0.01 |
| Gcnt1     | 0.36 | 0.02 |
| Nlrc4     | 0.35 | 0.01 |
| Vps37d    | 0.35 | 0.04 |
| Mms22l    | 0.35 | 0.01 |
| Impa2     | 0.35 | 0.02 |
| Serpnb6a  | 0.35 | 0.00 |
| Csf2rb    | 0.35 | 0.04 |
| Angptl4   | 0.35 | 0.02 |
| Kdelr3    | 0.35 | 0.02 |
| Itgae     | 0.35 | 0.02 |
| Fstl1     | 0.35 | 0.04 |

|           |      |      |
|-----------|------|------|
| Atp6v0e2  | 0.35 | 0.02 |
| Mcm4      | 0.35 | 0.05 |
| Zc2hc1a   | 0.35 | 0.01 |
| Tm6sf1    | 0.35 | 0.03 |
| Gm9780    | 0.35 | 0.00 |
| Pla2g7    | 0.35 | 0.00 |
| Gm5148    | 0.35 | 0.02 |
| Hist2h2ab | 0.35 | 0.00 |
| Gm5150    | 0.34 | 0.00 |
| Corin     | 0.34 | 0.04 |
| Tmem136   | 0.34 | 0.04 |
| Plac9b    | 0.34 | 0.01 |
| Myzap     | 0.34 | 0.02 |
| F3        | 0.34 | 0.04 |
| Xrcc2     | 0.34 | 0.01 |
| Sirpb1c   | 0.34 | 0.02 |
| Phlda3    | 0.34 | 0.04 |
| Tstd1     | 0.34 | 0.00 |
| Mfsd2a    | 0.34 | 0.05 |
| Prmt2     | 0.34 | 0.03 |
| Fen1      | 0.34 | 0.03 |
| Pafah1b3  | 0.34 | 0.00 |
| Plscr2    | 0.34 | 0.00 |
| Gm10282   | 0.34 | 0.00 |
| Ms4a6c    | 0.34 | 0.00 |
| Grb10     | 0.34 | 0.05 |
| Mpped2    | 0.34 | 0.02 |
| Grhl2     | 0.34 | 0.02 |
| Sdsl      | 0.34 | 0.04 |
| Specc1    | 0.34 | 0.04 |
| Arhgap22  | 0.34 | 0.04 |
| Vgll3     | 0.34 | 0.05 |
| Gm20503   | 0.34 | 0.03 |
| Palb2     | 0.34 | 0.01 |
| Pdlim4    | 0.34 | 0.02 |
| Cenpq     | 0.33 | 0.00 |

|           |      |      |
|-----------|------|------|
| Veph1     | 0.33 | 0.04 |
| Lrrc1     | 0.33 | 0.01 |
| Mbd4      | 0.33 | 0.01 |
| Lmnb1     | 0.33 | 0.04 |
| Cd33      | 0.33 | 0.01 |
| Tead2     | 0.33 | 0.05 |
| Rin1      | 0.33 | 0.01 |
| Bhlhb9    | 0.33 | 0.03 |
| Tnfaip8l2 | 0.33 | 0.00 |
| Cenpw     | 0.33 | 0.00 |
| Dync2li1  | 0.33 | 0.03 |
| Bmp4      | 0.33 | 0.03 |
| Lgals4    | 0.33 | 0.00 |
| Cd209a    | 0.33 | 0.01 |
| Hist2h2ac | 0.33 | 0.00 |
| Kcne3     | 0.33 | 0.00 |
| Sifn9     | 0.33 | 0.03 |
| Dbp       | 0.33 | 0.03 |
| Fancb     | 0.33 | 0.01 |
| Hist1h4j  | 0.33 | 0.00 |
| B4galt6   | 0.33 | 0.04 |
| Gm609     | 0.33 | 0.05 |
| P3h4      | 0.33 | 0.01 |
| Eps8      | 0.33 | 0.02 |
| Mturn     | 0.33 | 0.02 |
| Mcm2      | 0.33 | 0.04 |
| Kif24     | 0.33 | 0.01 |
| Alox5ap   | 0.32 | 0.01 |
| Map3k6    | 0.32 | 0.05 |
| Acot2     | 0.32 | 0.02 |
| Ms4a4a    | 0.32 | 0.02 |
| Poc1a     | 0.32 | 0.01 |
| Wdr62     | 0.32 | 0.02 |
| Plat      | 0.32 | 0.02 |
| Smim3     | 0.32 | 0.00 |
| Chek2     | 0.32 | 0.00 |



|          |      |      |
|----------|------|------|
| Schip1   | 0.32 | 0.03 |
| Arhgap19 | 0.32 | 0.01 |
| Hells    | 0.32 | 0.01 |
| E2f1     | 0.32 | 0.05 |
| Slc25a24 | 0.32 | 0.05 |
| Lgals1   | 0.32 | 0.00 |
| Slc25a4  | 0.32 | 0.01 |
| Hist1h4k | 0.32 | 0.01 |
| Pkmyt1   | 0.31 | 0.02 |
| Wfdc2    | 0.31 | 0.01 |
| Gm9844   | 0.31 | 0.00 |
| Hilpda   | 0.31 | 0.00 |
| Sh2d1b1  | 0.31 | 0.01 |
| Ifnlr1   | 0.31 | 0.05 |
| Cfap43   | 0.31 | 0.04 |
| Enah     | 0.31 | 0.03 |
| Dzip1l   | 0.31 | 0.04 |
| Gm9922   | 0.31 | 0.01 |
| Tagln    | 0.31 | 0.00 |
| Ccdc158  | 0.31 | 0.00 |
| Cdc45    | 0.31 | 0.01 |
| Tamm41   | 0.31 | 0.01 |
| Hsd17b13 | 0.31 | 0.01 |
| Plac9a   | 0.31 | 0.00 |
| Susd3    | 0.31 | 0.01 |
| Rcan3    | 0.31 | 0.02 |
| Ccl6     | 0.31 | 0.00 |
| Fkbp1b   | 0.31 | 0.02 |
| Nrtn     | 0.31 | 0.00 |
| Selenoh  | 0.31 | 0.00 |
| Ahnak    | 0.31 | 0.05 |
| Phldb1   | 0.30 | 0.04 |
| Pmp22    | 0.30 | 0.03 |
| Pld6     | 0.30 | 0.02 |
| Kazn     | 0.30 | 0.01 |
| Tspan6   | 0.30 | 0.00 |

|               |      |      |
|---------------|------|------|
| Selenbp2      | 0.30 | 0.03 |
| Fam174b       | 0.30 | 0.03 |
| Slc7a6        | 0.30 | 0.02 |
| Pkhd1         | 0.30 | 0.05 |
| Rnf32         | 0.30 | 0.01 |
| Hacd4         | 0.30 | 0.00 |
| 9530077C05Rik | 0.30 | 0.04 |
| Gm2007        | 0.30 | 0.01 |
| Slc30a3       | 0.30 | 0.02 |
| Nucb2         | 0.30 | 0.04 |
| Epdr1         | 0.29 | 0.01 |
| Myl12a        | 0.29 | 0.01 |
| Mapk13        | 0.29 | 0.01 |
| Tmem119       | 0.29 | 0.05 |
| Anxa3         | 0.29 | 0.00 |
| Col4a4        | 0.29 | 0.05 |
| 43351         | 0.29 | 0.05 |
| Agpat4        | 0.29 | 0.02 |
| Ccdc18        | 0.29 | 0.01 |
| P4ha2         | 0.29 | 0.03 |
| Fry           | 0.29 | 0.04 |
| Fcgr3         | 0.29 | 0.00 |
| Yap1          | 0.29 | 0.05 |
| Cenpk         | 0.29 | 0.00 |
| Ms4a8a        | 0.29 | 0.00 |
| BC034090      | 0.29 | 0.04 |
| Eps8l1        | 0.29 | 0.01 |
| H2afx         | 0.29 | 0.01 |
| Mcm6          | 0.29 | 0.02 |
| Anxa2         | 0.29 | 0.02 |
| Wfdc3         | 0.29 | 0.00 |
| Nrg4          | 0.29 | 0.02 |
| Zgrf1         | 0.29 | 0.01 |
| Fbxo5         | 0.29 | 0.00 |
| Tmsb15b1      | 0.29 | 0.00 |
| Krt23         | 0.29 | 0.02 |

|               |      |      |
|---------------|------|------|
| Pdzk1ip1      | 0.29 | 0.01 |
| Dapp1         | 0.28 | 0.01 |
| Syt15         | 0.28 | 0.05 |
| S100a4        | 0.28 | 0.00 |
| Kcnh7         | 0.28 | 0.03 |
| Tmem150b      | 0.28 | 0.02 |
| Vldlr         | 0.28 | 0.02 |
| Asns          | 0.28 | 0.01 |
| Gnai1         | 0.28 | 0.02 |
| Rad18         | 0.28 | 0.00 |
| Ssbp2         | 0.28 | 0.00 |
| Ccr2          | 0.28 | 0.00 |
| Lmcd1         | 0.28 | 0.03 |
| 6720489N17Rik | 0.28 | 0.00 |
| Gm6169        | 0.28 | 0.03 |
| Tcte2         | 0.28 | 0.02 |
| Syng1         | 0.28 | 0.00 |
| Amotl2        | 0.28 | 0.01 |
| Tgfb2         | 0.28 | 0.04 |
| Krt80         | 0.28 | 0.05 |
| Hist1h3e      | 0.28 | 0.00 |
| Shisa4        | 0.28 | 0.05 |
| Hist1h4b      | 0.27 | 0.00 |
| Hist1h4n      | 0.27 | 0.00 |
| Chaf1b        | 0.27 | 0.02 |
| Fam81a        | 0.27 | 0.03 |
| Ncapg2        | 0.27 | 0.01 |
| Relt          | 0.27 | 0.03 |
| Pdgfrl        | 0.27 | 0.04 |
| Fkbp11        | 0.27 | 0.00 |
| Ihh           | 0.27 | 0.02 |
| Prrg4         | 0.27 | 0.04 |
| Tmem221       | 0.27 | 0.03 |
| Them6         | 0.27 | 0.01 |
| Wisp2         | 0.27 | 0.04 |
| Tmem246       | 0.27 | 0.02 |

|               |      |      |
|---------------|------|------|
| Haspin        | 0.27 | 0.02 |
| Cep112        | 0.27 | 0.00 |
| Dab2          | 0.27 | 0.03 |
| Plp2          | 0.27 | 0.03 |
| Trpv4         | 0.27 | 0.05 |
| Cdca7l        | 0.27 | 0.02 |
| Zfp57         | 0.27 | 0.01 |
| Stk17b        | 0.27 | 0.00 |
| Cit           | 0.27 | 0.05 |
| Cep295nl      | 0.26 | 0.01 |
| Ddit4         | 0.26 | 0.02 |
| Hist1h2ba     | 0.26 | 0.00 |
| Tcf19         | 0.26 | 0.03 |
| Tuft1         | 0.26 | 0.02 |
| Htra3         | 0.26 | 0.02 |
| Zfp850        | 0.26 | 0.04 |
| Trim34b       | 0.26 | 0.00 |
| Il1rl2        | 0.26 | 0.01 |
| Enc1          | 0.26 | 0.04 |
| Vill          | 0.26 | 0.03 |
| Rasd1         | 0.26 | 0.01 |
| Adcy1         | 0.26 | 0.03 |
| Ajuba         | 0.25 | 0.02 |
| Milr1         | 0.25 | 0.00 |
| S100a6        | 0.25 | 0.00 |
| Cox6b2        | 0.25 | 0.00 |
| Lig1          | 0.25 | 0.04 |
| E2f7          | 0.25 | 0.04 |
| 2610524H06Rik | 0.25 | 0.00 |
| Pycr1         | 0.25 | 0.02 |
| Hmgb2         | 0.25 | 0.00 |
| Ccnf          | 0.25 | 0.02 |
| Ptgr1         | 0.25 | 0.01 |
| Tesmin        | 0.25 | 0.02 |
| Eda2r         | 0.25 | 0.05 |
| Ciart         | 0.25 | 0.05 |

|               |      |      |
|---------------|------|------|
| Id1           | 0.25 | 0.01 |
| Syce2         | 0.25 | 0.00 |
| Nrm           | 0.25 | 0.02 |
| Ccdc34        | 0.25 | 0.01 |
| Tgif2         | 0.25 | 0.00 |
| Plk4          | 0.25 | 0.00 |
| Col23a1       | 0.25 | 0.03 |
| Afp           | 0.25 | 0.01 |
| Spint1        | 0.25 | 0.03 |
| Mthfd1l       | 0.24 | 0.00 |
| Hist1h2br     | 0.24 | 0.03 |
| Crym          | 0.24 | 0.02 |
| Smc2          | 0.24 | 0.01 |
| Jdp2          | 0.24 | 0.01 |
| Hist1h2ac     | 0.24 | 0.00 |
| Rbm3          | 0.24 | 0.00 |
| Ccne1         | 0.24 | 0.01 |
| Ikzf4         | 0.24 | 0.03 |
| Cks1b         | 0.24 | 0.00 |
| L3mbtl1       | 0.24 | 0.01 |
| Zfp651        | 0.23 | 0.03 |
| 4930579G24Rik | 0.23 | 0.00 |
| Usp2          | 0.23 | 0.02 |
| Ypel1         | 0.23 | 0.01 |
| Gadd45b       | 0.23 | 0.01 |
| Pkia          | 0.23 | 0.00 |
| Ranbp17       | 0.23 | 0.03 |
| Hist1h2bg     | 0.23 | 0.00 |
| Ddah2         | 0.23 | 0.02 |
| Ncapd2        | 0.23 | 0.01 |
| Syt9          | 0.23 | 0.03 |
| Tet1          | 0.23 | 0.00 |
| Igdcc4        | 0.23 | 0.04 |
| Cenpa         | 0.23 | 0.00 |
| Pole          | 0.23 | 0.03 |
| Lamc3         | 0.23 | 0.05 |

|           |      |      |
|-----------|------|------|
| Chn1      | 0.23 | 0.04 |
| Nipal2    | 0.23 | 0.05 |
| Hspb2     | 0.23 | 0.00 |
| Klc3      | 0.23 | 0.03 |
| Mapk8ip1  | 0.23 | 0.02 |
| Eif3j2    | 0.23 | 0.03 |
| Vcan      | 0.23 | 0.04 |
| Ranbp3l   | 0.22 | 0.00 |
| Prune2    | 0.22 | 0.02 |
| Tead4     | 0.22 | 0.03 |
| Hspa12a   | 0.22 | 0.03 |
| Acta2     | 0.22 | 0.03 |
| Bicc1     | 0.22 | 0.04 |
| P4htm     | 0.22 | 0.03 |
| Olfm2     | 0.22 | 0.03 |
| Chaf1a    | 0.22 | 0.04 |
| Trip13    | 0.22 | 0.00 |
| Glipr2    | 0.22 | 0.01 |
| Sgpp2     | 0.22 | 0.04 |
| Incenp    | 0.22 | 0.02 |
| Cenpn     | 0.22 | 0.01 |
| Per1      | 0.22 | 0.02 |
| BC055324  | 0.22 | 0.01 |
| Fxyd3     | 0.22 | 0.00 |
| Arhgap11a | 0.22 | 0.01 |
| Dsn1      | 0.22 | 0.01 |
| Bdh2      | 0.22 | 0.00 |
| Ctps      | 0.22 | 0.01 |
| Timp2     | 0.21 | 0.04 |
| Ogn       | 0.21 | 0.02 |
| Tnfaip6   | 0.21 | 0.00 |
| Ctxn1     | 0.21 | 0.03 |
| Mybl2     | 0.21 | 0.04 |
| Hist1h4a  | 0.21 | 0.00 |
| Hist1h1d  | 0.21 | 0.00 |
| Timp1     | 0.21 | 0.01 |

|           |      |      |
|-----------|------|------|
| C1qtnf6   | 0.21 | 0.02 |
| Ror1      | 0.21 | 0.02 |
| Ska2      | 0.21 | 0.00 |
| Nfe2l3    | 0.21 | 0.05 |
| Ltk       | 0.20 | 0.05 |
| Arhgap33  | 0.20 | 0.01 |
| Slc15a2   | 0.20 | 0.01 |
| Ankrd29   | 0.20 | 0.00 |
| Ccne2     | 0.20 | 0.00 |
| Ager      | 0.20 | 0.03 |
| Cd163     | 0.20 | 0.04 |
| Ddias     | 0.20 | 0.00 |
| Fcrls     | 0.20 | 0.00 |
| Gstm5     | 0.20 | 0.00 |
| Ankrd37   | 0.20 | 0.00 |
| Hist1h4f  | 0.20 | 0.00 |
| Ppp1r3g   | 0.20 | 0.01 |
| Dio3      | 0.20 | 0.02 |
| AA986860  | 0.20 | 0.02 |
| Hist1h3f  | 0.20 | 0.00 |
| Efna4     | 0.19 | 0.03 |
| Ube2t     | 0.19 | 0.00 |
| Bora      | 0.19 | 0.01 |
| Rims2     | 0.19 | 0.04 |
| Depdc1b   | 0.19 | 0.00 |
| Krt7      | 0.19 | 0.05 |
| Asf1b     | 0.19 | 0.01 |
| Gtse1     | 0.19 | 0.01 |
| Trim59    | 0.19 | 0.00 |
| Fcgbp     | 0.19 | 0.02 |
| Mad2l1    | 0.19 | 0.00 |
| Hist2h3c2 | 0.19 | 0.01 |
| Tppp3     | 0.19 | 0.01 |
| Kif18a    | 0.18 | 0.00 |
| Nsl1      | 0.18 | 0.01 |
| Fgd3      | 0.18 | 0.03 |

|               |      |      |
|---------------|------|------|
| Sema3c        | 0.18 | 0.01 |
| S100a11       | 0.18 | 0.01 |
| Cnksr1        | 0.18 | 0.02 |
| Hist1h2ak     | 0.18 | 0.00 |
| Cyp4f18       | 0.18 | 0.01 |
| Rasl10a       | 0.18 | 0.01 |
| Spc25         | 0.18 | 0.01 |
| Nmnat2        | 0.18 | 0.04 |
| Mgl2          | 0.18 | 0.01 |
| Chek1         | 0.18 | 0.00 |
| Ticrr         | 0.18 | 0.01 |
| Tmem151a      | 0.18 | 0.02 |
| Kif20b        | 0.18 | 0.00 |
| Hebp2         | 0.17 | 0.00 |
| Olfml2b       | 0.17 | 0.03 |
| Chtf18        | 0.17 | 0.01 |
| Hist1h3i      | 0.17 | 0.00 |
| Calml4        | 0.17 | 0.00 |
| Rab3b         | 0.17 | 0.01 |
| Fbp2          | 0.17 | 0.00 |
| Prph          | 0.17 | 0.02 |
| Chrb1         | 0.17 | 0.02 |
| Bard1         | 0.17 | 0.01 |
| Hist2h3b      | 0.17 | 0.00 |
| Spdl1         | 0.17 | 0.01 |
| Hist1h2bf     | 0.17 | 0.00 |
| 1810010D01Rik | 0.17 | 0.02 |
| A430105I19Rik | 0.17 | 0.01 |
| Spr1a         | 0.17 | 0.01 |
| Slc35f2       | 0.17 | 0.02 |
| Gpr141        | 0.17 | 0.00 |
| Hist1h3h      | 0.17 | 0.00 |
| Tedc1         | 0.17 | 0.01 |
| Rgs11         | 0.17 | 0.01 |
| Scube3        | 0.16 | 0.04 |
| Adamdec1      | 0.16 | 0.00 |



|               |      |      |
|---------------|------|------|
| Cgref1        | 0.16 | 0.00 |
| Ptgfr         | 0.16 | 0.01 |
| Klf5          | 0.16 | 0.05 |
| Rrm2          | 0.16 | 0.01 |
| Actg2         | 0.16 | 0.05 |
| Cbr3          | 0.16 | 0.00 |
| Pde6c         | 0.16 | 0.00 |
| Polq          | 0.16 | 0.04 |
| Dtna          | 0.16 | 0.01 |
| Hist1h3d      | 0.16 | 0.00 |
| Fads3         | 0.16 | 0.02 |
| Gins2         | 0.16 | 0.00 |
| Tacc3         | 0.16 | 0.00 |
| C330027C09Rik | 0.16 | 0.00 |
| 1810010H24Rik | 0.16 | 0.03 |
| Mis18bp1      | 0.15 | 0.00 |
| Klhdc7a       | 0.15 | 0.02 |
| Mcm5          | 0.15 | 0.01 |
| Ncaph         | 0.15 | 0.01 |
| Apoa4         | 0.15 | 0.01 |
| Adam33        | 0.15 | 0.02 |
| 2310007B03Rik | 0.15 | 0.02 |
| Cdca8         | 0.15 | 0.01 |
| Ccr1          | 0.15 | 0.00 |
| Hist1h3g      | 0.15 | 0.00 |
| Mgat4c        | 0.15 | 0.00 |
| Hist4h4       | 0.15 | 0.00 |
| Rad51         | 0.15 | 0.00 |
| Omd           | 0.15 | 0.00 |
| Clspn         | 0.15 | 0.00 |
| Ankrd1        | 0.15 | 0.03 |
| Ercc6l        | 0.14 | 0.00 |
| Ctgf          | 0.14 | 0.01 |
| Chrdl1        | 0.14 | 0.04 |
| Hist1h2bh     | 0.14 | 0.00 |
| B4galt2       | 0.14 | 0.00 |

|           |      |      |
|-----------|------|------|
| Pclaf     | 0.14 | 0.00 |
| Stmn1     | 0.14 | 0.00 |
| Uhrf1     | 0.14 | 0.02 |
| Figl1     | 0.14 | 0.00 |
| Rad54l    | 0.14 | 0.01 |
| Fstl3     | 0.14 | 0.03 |
| Zwilch    | 0.14 | 0.00 |
| Kifc5b    | 0.14 | 0.01 |
| Cbr2      | 0.14 | 0.02 |
| Kif14     | 0.14 | 0.01 |
| Hist1h3b  | 0.13 | 0.00 |
| Sult2b1   | 0.13 | 0.01 |
| Hist1h2ab | 0.13 | 0.00 |
| Hist1h2bn | 0.13 | 0.00 |
| Cenpe     | 0.13 | 0.02 |
| Traip     | 0.13 | 0.00 |
| Bub1b     | 0.13 | 0.01 |
| Aurka     | 0.13 | 0.00 |
| Efemp1    | 0.13 | 0.02 |
| Glis2     | 0.13 | 0.02 |
| Espl1     | 0.13 | 0.01 |
| Nkain1    | 0.13 | 0.01 |
| Kif23     | 0.13 | 0.01 |
| Tbx1      | 0.13 | 0.05 |
| Fam83b    | 0.13 | 0.01 |
| Hist1h2bl | 0.13 | 0.00 |
| Rad54b    | 0.13 | 0.00 |
| Dtl       | 0.13 | 0.00 |
| Hist1h3a  | 0.13 | 0.00 |
| Hist1h2ae | 0.13 | 0.00 |
| Slc4a3    | 0.13 | 0.02 |
| Rad51ap1  | 0.13 | 0.00 |
| Hist1h2bp | 0.13 | 0.00 |
| Cidec     | 0.13 | 0.01 |
| Gprc5a    | 0.13 | 0.04 |
| Tinag     | 0.13 | 0.00 |

|               |      |      |
|---------------|------|------|
| Hist1h2bk     | 0.12 | 0.00 |
| Oip5          | 0.12 | 0.00 |
| Hist1h2ag     | 0.12 | 0.00 |
| Lamc2         | 0.12 | 0.03 |
| Lce6a         | 0.12 | 0.00 |
| Hist1h2ai     | 0.12 | 0.00 |
| Cenps         | 0.12 | 0.00 |
| Ccnd1         | 0.12 | 0.01 |
| Hist1h2ad     | 0.12 | 0.00 |
| Hist1h2ao     | 0.12 | 0.00 |
| Hist1h2ap     | 0.12 | 0.00 |
| Arhgef39      | 0.12 | 0.00 |
| 2810408A11Rik | 0.12 | 0.00 |
| Hist1h2bj     | 0.12 | 0.00 |
| Hist1h2ah     | 0.12 | 0.00 |
| Ttll10        | 0.12 | 0.01 |
| Fam13c        | 0.12 | 0.01 |
| Hist1h2bb     | 0.12 | 0.00 |
| Neurl1b       | 0.12 | 0.02 |
| Ect2          | 0.12 | 0.00 |
| Fancd2        | 0.11 | 0.00 |
| Pcolce        | 0.11 | 0.02 |
| Phgdh         | 0.11 | 0.01 |
| Kcne4         | 0.11 | 0.05 |
| Stil          | 0.11 | 0.00 |
| Fam46b        | 0.11 | 0.02 |
| Ttc22         | 0.11 | 0.01 |
| Prc1          | 0.11 | 0.01 |
| Actr3b        | 0.11 | 0.00 |
| Cdca5         | 0.11 | 0.00 |
| Ppp2r2b       | 0.11 | 0.03 |
| Arnt2         | 0.11 | 0.05 |
| 1700011H14Rik | 0.11 | 0.00 |
| Kif15         | 0.11 | 0.00 |
| Cryab         | 0.11 | 0.01 |
| Hist1h2af     | 0.11 | 0.00 |

|           |      |      |
|-----------|------|------|
| Hist2h2bb | 0.10 | 0.00 |
| Hist1h2an | 0.10 | 0.00 |
| Spag5     | 0.10 | 0.00 |
| Slit2     | 0.10 | 0.02 |
| Hist1h3c  | 0.10 | 0.00 |
| Racgap1   | 0.10 | 0.00 |
| Sftpd     | 0.10 | 0.01 |
| Hist1h1a  | 0.10 | 0.00 |
| Cdca2     | 0.10 | 0.00 |
| Sgo2a     | 0.10 | 0.00 |
| Adamts17  | 0.10 | 0.00 |
| Pak3      | 0.10 | 0.01 |
| Ankle1    | 0.10 | 0.00 |
| Mmp7      | 0.10 | 0.05 |
| Hist1h2bm | 0.10 | 0.00 |
| Psat1     | 0.10 | 0.00 |
| Kif22     | 0.10 | 0.00 |
| Hist1h1b  | 0.10 | 0.00 |
| Kn11      | 0.10 | 0.00 |
| Epn3      | 0.10 | 0.02 |
| Exo1      | 0.10 | 0.02 |
| Arxes2    | 0.10 | 0.01 |
| Cfap44    | 0.10 | 0.00 |
| Fa2h      | 0.10 | 0.01 |
| Kif4      | 0.10 | 0.00 |
| Spp1      | 0.10 | 0.01 |
| Nusap1    | 0.09 | 0.00 |
| Diaph3    | 0.09 | 0.01 |
| Mki67     | 0.09 | 0.02 |
| Top2a     | 0.09 | 0.01 |
| Ncapg     | 0.09 | 0.00 |
| Aurkb     | 0.09 | 0.00 |
| Cdk1      | 0.09 | 0.00 |
| Kntc1     | 0.09 | 0.01 |
| Neil3     | 0.09 | 0.00 |
| Parm1     | 0.09 | 0.03 |

|        |      |      |
|--------|------|------|
| Gsta1  | 0.09 | 0.01 |
| Cep55  | 0.09 | 0.00 |
| H1fx   | 0.08 | 0.04 |
| Klrg2  | 0.08 | 0.02 |
| Prr11  | 0.08 | 0.01 |
| Klra17 | 0.08 | 0.00 |
| Kifc1  | 0.08 | 0.01 |
| Sgo1   | 0.08 | 0.00 |
| Cenpp  | 0.08 | 0.00 |
| Esco2  | 0.08 | 0.00 |
| Apela  | 0.08 | 0.01 |
| Anln   | 0.08 | 0.00 |
| Bub1   | 0.08 | 0.00 |
| Scn7a  | 0.08 | 0.01 |
| Stc2   | 0.08 | 0.01 |
| Ube2c  | 0.08 | 0.00 |
| Ccl17  | 0.08 | 0.00 |
| Aspm   | 0.08 | 0.01 |
| Wnt6   | 0.08 | 0.02 |
| Fanca  | 0.08 | 0.01 |
| Cenpu  | 0.08 | 0.00 |
| Zfp185 | 0.08 | 0.01 |
| Mxd3   | 0.08 | 0.00 |
| Bex1   | 0.07 | 0.00 |
| Cdkn3  | 0.07 | 0.00 |
| Csrnp3 | 0.07 | 0.00 |
| Pimreg | 0.07 | 0.00 |
| Tpx2   | 0.07 | 0.01 |
| Parpbp | 0.07 | 0.00 |
| Ccnb1  | 0.07 | 0.00 |
| Dlgap5 | 0.07 | 0.00 |
| Capn11 | 0.07 | 0.02 |
| Mastl  | 0.07 | 0.01 |
| Gpc3   | 0.07 | 0.02 |
| Pla2g5 | 0.07 | 0.01 |
| Knstrn | 0.07 | 0.00 |

|               |      |      |
|---------------|------|------|
| Ndc80         | 0.07 | 0.00 |
| Kif18b        | 0.07 | 0.01 |
| Ccna2         | 0.07 | 0.00 |
| Tmem130       | 0.07 | 0.03 |
| Foxm1         | 0.07 | 0.01 |
| Fam83d        | 0.07 | 0.00 |
| Plk1          | 0.06 | 0.01 |
| Psrc1         | 0.06 | 0.00 |
| Hist1h2be     | 0.06 | 0.05 |
| Nuf2          | 0.06 | 0.00 |
| Cdca3         | 0.06 | 0.00 |
| Gm3776        | 0.06 | 0.01 |
| Pif1          | 0.06 | 0.00 |
| Kif20a        | 0.06 | 0.00 |
| Ckap2l        | 0.06 | 0.01 |
| Iqgap3        | 0.06 | 0.01 |
| Cenph         | 0.06 | 0.00 |
| Mrgprb3       | 0.06 | 0.00 |
| Birc5         | 0.05 | 0.00 |
| Chst9         | 0.05 | 0.00 |
| Cdc20         | 0.05 | 0.00 |
| Fanci         | 0.05 | 0.00 |
| Cenpf         | 0.05 | 0.01 |
| Kif2c         | 0.05 | 0.00 |
| Shcbp1        | 0.05 | 0.00 |
| 2900011O08Rik | 0.05 | 0.01 |
| Fgfbp1        | 0.05 | 0.00 |
| Ifitm7        | 0.04 | 0.00 |
| Ckap2         | 0.04 | 0.00 |
| Pbk           | 0.04 | 0.00 |
| Paqr6         | 0.04 | 0.01 |
| Ska1          | 0.04 | 0.00 |
| Tceal5        | 0.04 | 0.02 |
| Ppp2r3d       | 0.04 | 0.05 |
| Fam107a       | 0.04 | 0.01 |
| Mrgprb2       | 0.04 | 0.00 |
| Hmmr          | 0.04 | 0.00 |
| Cdc25c        | 0.04 | 0.01 |
| Ccnb2         | 0.04 | 0.00 |

|         |      |      |
|---------|------|------|
| Melk    | 0.03 | 0.00 |
| Klk1b22 | 0.03 | 0.00 |
| Hs3st2  | 0.03 | 0.01 |
| Troap   | 0.03 | 0.01 |
| Krt4    | 0.03 | 0.03 |
| Ska3    | 0.03 | 0.00 |
| Ttk     | 0.03 | 0.00 |
| Cenpi   | 0.03 | 0.00 |
| Depdc1a | 0.03 | 0.00 |
| Muc13   | 0.03 | 0.01 |
| Asb15   | 0.03 | 0.02 |
| Gli2    | 0.03 | 0.04 |
| Rbp7    | 0.02 | 0.00 |
| Dlk2    | 0.02 | 0.02 |
| Meig1   | 0.01 | 0.00 |
| Spink1  | 0.01 | 0.00 |
| Gal3st2 | 0.01 | 0.00 |
| Igf2bp1 | 0.01 | 0.01 |
| Psca    | 0.00 | 0.00 |

**Table S2. DNA Footprinting reveals increased occupancy of TEAD and FOS-JUN in YAP1 ON tumors compared to D33 hbHeps.** Motifs with a z-score <-1 shown, Factor motif occupancy increased in YAP1 ON tumors compared to YAP1 OFF D33 hbHeps

| Motif                | Num   | TC_YAPon | TC_YAPoff | Z_score  |
|----------------------|-------|----------|-----------|----------|
| MA0080.4.SPI1        | 5007  | 0.778149 | 0.538991  | -3.62052 |
| MA0081.1.SPIB        | 6272  | 0.755879 | 0.600586  | -3.03093 |
| MA0645.1.ETV6        | 2693  | 0.924492 | 0.693585  | -3.00384 |
| MA0700.1.LHX2        | 25    | 0.683405 | 0.574311  | -2.36181 |
| MA1130.1.FOSL2::JUN  | 3888  | 0.750448 | 0.576744  | -2.02294 |
| MA1141.1.FOS::JUND   | 3339  | 0.752609 | 0.591832  | -2.02104 |
| MA0050.2.IRF1        | 11047 | 0.725148 | 0.63215   | -2.00134 |
| MA0635.1.BARHL2      | 529   | 0.679539 | 0.661234  | -1.98751 |
| MA0528.1.ZNF263      | 26793 | 0.961864 | 0.8601    | -1.97823 |
| MA0902.1.HOXB2       | 14    | 0.618762 | 0.457821  | -1.96636 |
| MA1134.1.FOS::JUNB   | 4283  | 0.733577 | 0.561284  | -1.96465 |
| MA0841.1.NFE2        | 3661  | 0.735318 | 0.578604  | -1.92478 |
| MA0099.3.FOS::JUN    | 4495  | 0.744406 | 0.578429  | -1.90219 |
| MA0640.1.ELF3        | 3248  | 0.967451 | 0.822858  | -1.89177 |
| MA1121.1.TEAD2       | 2909  | 0.792292 | 0.644182  | -1.88482 |
| MA1135.1.FOSB::JUNB  | 4721  | 0.731667 | 0.564872  | -1.87261 |
| MA0489.1.JUN(var.2)  | 4242  | 0.716737 | 0.568     | -1.85442 |
| MA0655.1.JDP2        | 4008  | 0.710884 | 0.548633  | -1.84141 |
| MA0808.1.TEAD3       | 2901  | 0.780134 | 0.618662  | -1.81452 |
| MA0149.1.EWSR1-FLI1  | 13626 | 0.898555 | 0.808222  | -1.8074  |
| MA0136.2.ELF5        | 4654  | 0.915554 | 0.757198  | -1.80655 |
| MA0090.2.TEAD1       | 2946  | 0.748555 | 0.600178  | -1.79365 |
| MA0471.1.E2F6        | 6216  | 1.001446 | 0.910616  | -1.75167 |
| MA0490.1.JUNB        | 4958  | 0.728213 | 0.577619  | -1.74798 |
| MA0486.2.HSF1        | 293   | 0.703584 | 0.634885  | -1.686   |
| MA0809.1.TEAD4       | 647   | 0.696452 | 0.571292  | -1.64175 |
| MA0687.1.SPIC        | 1986  | 0.70014  | 0.626577  | -1.62383 |
| MA1128.1.FOSL1::JUN  | 429   | 0.768187 | 0.666081  | -1.53249 |
| MA0827.1.OLIG3       | 44    | 0.51697  | 0.564302  | -1.52551 |
| MA1418.1.IRF3        | 2970  | 0.762067 | 0.678593  | -1.51175 |
| MA1137.1.FOSL1::JUNB | 2233  | 0.723122 | 0.598112  | -1.43477 |
| MA0598.2.EHF         | 3268  | 1.00357  | 0.862099  | -1.42871 |
| MA0073.1.RREB1       | 16124 | 0.891048 | 0.796752  | -1.41162 |



|                        |       |          |          |          |
|------------------------|-------|----------|----------|----------|
| MA0818.1.BHLHE22       | 38    | 0.568836 | 0.474767 | -1.40013 |
| MA0057.1.MZF1(var.2)   | 4652  | 0.938087 | 0.854863 | -1.36519 |
| MA0778.1.NFKB2         | 2314  | 0.862555 | 0.74159  | -1.34449 |
| MA1138.1.FOSL2::JUNB   | 179   | 0.595233 | 0.484966 | -1.33929 |
| MA0517.1.STAT1::STAT2  | 6348  | 0.717002 | 0.626025 | -1.3261  |
| MA0694.1.ZBTB7B        | 385   | 1.058201 | 0.979285 | -1.32292 |
| MA0741.1.KLF16         | 6177  | 1.214019 | 1.132158 | -1.29843 |
| MA0491.1.JUND          | 689   | 0.682824 | 0.571315 | -1.29697 |
| MA1101.1.BACH2         | 4131  | 0.698715 | 0.612523 | -1.29594 |
| MA0062.2.Gabpa         | 3856  | 1.38778  | 1.277995 | -1.26133 |
| MA0641.1.ELF4          | 801   | 1.06468  | 0.957842 | -1.25495 |
| MA0076.2.ELK4          | 4828  | 1.178598 | 1.074044 | -1.24491 |
| MA0462.1.BATF::JUN     | 3723  | 0.690766 | 0.595798 | -1.21229 |
| MA0476.1.FOS           | 2537  | 0.691186 | 0.593478 | -1.21043 |
| MA0493.1.Klf1          | 8860  | 1.209899 | 1.127992 | -1.1817  |
| MA0098.3.ETS1          | 573   | 0.706173 | 0.584575 | -1.17598 |
| MA0163.1.PLAG1         | 5413  | 1.110323 | 1.027596 | -1.15754 |
| MA1153.1.Smad4         | 2638  | 0.730578 | 0.656664 | -1.12025 |
| MA0750.2.ZBTB7A        | 4768  | 1.217727 | 1.113749 | -1.11617 |
| MA0753.1.ZNF740        | 12500 | 1.027477 | 0.937335 | -1.11131 |
| MA0079.3.SP1           | 14445 | 1.338151 | 1.27327  | -1.08826 |
| MA0139.1.CTCF          | 8289  | 0.894397 | 0.831166 | -1.08377 |
| MA0516.1.SP2           | 19313 | 1.465544 | 1.402844 | -1.08314 |
| MA0525.2.TP63          | 341   | 0.957683 | 0.944956 | -1.06602 |
| MA0116.1.Znf423        | 2834  | 0.926574 | 0.851325 | -1.0471  |
| MA0865.1.E2F8          | 1633  | 0.875143 | 0.830128 | -1.04313 |
| MA0815.1.TFAP2C(var.3) | 606   | 1.403677 | 1.282608 | -1.03202 |
| MA0150.2.Nfe2l2        | 2691  | 0.68869  | 0.631014 | -1.02888 |
| MA0657.1.KLF13         | 2124  | 1.24792  | 1.199901 | -1.02637 |
| MA0751.1.ZIC4          | 1009  | 1.184411 | 1.122232 | -1.00912 |
| MA1125.1.ZNF384        | 20604 | 0.674298 | 0.64212  | -1.00197 |
| MA0747.1.SP8           | 13194 | 1.284385 | 1.214146 | -1.00064 |

**Table S3. DNA Footprinting reveals increased occupancy in D33 hbHeps of canonical liver differentiation factors compared to YAP1 ON tumors.** Motifs with a z-score>1 shown, Factor motif occupancy increased in YAP1 OFF D33 hbHeps compared to YAP1 ON

| Motif                | Num  | TC_YAPon   | TC_YAPoff  | Z_score     |
|----------------------|------|------------|------------|-------------|
| MA0699.1.LBX2        | 12   | 0.32653967 | 0.52311015 | 5.924942502 |
| MA0153.2.HNF1B       | 3826 | 0.80248743 | 1.0193863  | 4.415248951 |
| MA0502.1.NFYB        | 1965 | 1.0852838  | 1.3233035  | 4.009027299 |
| MA0060.3.NFYA        | 2274 | 0.997634   | 1.2149532  | 3.86143795  |
| MA0046.2.HNF1A       | 3752 | 0.7699377  | 0.95962375 | 3.564307538 |
| MA0755.1.CUX2        | 590  | 0.6183872  | 0.8066129  | 3.180869541 |
| MA0679.1.ONECUT1     | 1000 | 0.6086101  | 0.7874461  | 3.121112524 |
| MA0836.1.CEBPD       | 90   | 0.50474006 | 0.7128465  | 3.001319336 |
| MA0754.1.CUX1        | 94   | 0.70393884 | 0.8852368  | 2.943199104 |
| MA0611.1.Dux         | 2116 | 0.76220053 | 0.93064123 | 2.80685777  |
| MA0837.1.CEBPE       | 332  | 0.6501896  | 0.8423744  | 2.62255491  |
| MA0628.1.POU6F1      | 411  | 0.6863035  | 0.76014477 | 2.417984064 |
| MA0910.1.Hoxd8       | 1949 | 0.610785   | 0.7277515  | 2.300017373 |
| MA0897.1.Hmx2        | 145  | 0.6376049  | 0.82093495 | 2.298592894 |
| MA0790.1.POU4F1      | 2261 | 0.6019612  | 0.7082293  | 2.209166145 |
| MA0791.1.POU4F3      | 770  | 0.60553205 | 0.7336625  | 2.134941679 |
| MA0757.1.ONECUT3     | 577  | 0.57527816 | 0.6667662  | 1.943141712 |
| MA0780.1.PAX3        | 1268 | 0.52953994 | 0.6535507  | 1.909255033 |
| MA0102.3.CEBPA       | 3341 | 0.61856204 | 0.7617427  | 1.907801839 |
| MA0851.1.Foxj3       | 3709 | 0.5940336  | 0.69034183 | 1.782839857 |
| MA0033.2.FOXL1       | 2503 | 0.7034454  | 0.7881816  | 1.780195203 |
| MA0464.2.BHLHE40     | 86   | 0.70498097 | 0.85164917 | 1.73417386  |
| MA0888.1.EVX2        | 72   | 0.5732519  | 0.65915495 | 1.69652474  |
| MA0833.1.ATF4        | 1820 | 0.69059515 | 0.8065345  | 1.690420572 |
| MA0602.1.Arid5a      | 1245 | 0.63892263 | 0.74046844 | 1.680034965 |
| MA0115.1.NR1H2::RXRA | 2978 | 0.61687076 | 0.79525775 | 1.664114558 |
| MA0614.1.Foxj2       | 2968 | 0.63072777 | 0.71427464 | 1.61301998  |
| MA0677.1.Nr2f6       | 1065 | 0.65457076 | 0.7937308  | 1.525219188 |
| MA0846.1.FOXC2       | 5487 | 0.5905316  | 0.686183   | 1.518921543 |
| MA0113.3.NR3C1       | 238  | 0.6162055  | 0.636031   | 1.516346913 |
| MA1148.1.PPARA::RXRA | 2981 | 0.6738655  | 0.8230723  | 1.511865996 |
| MA0032.2.FOXC1       | 1404 | 0.5819075  | 0.6707976  | 1.479346836 |

|                      |      |            |            |             |
|----------------------|------|------------|------------|-------------|
| MA0070.1.PBX1        | 1659 | 0.6675985  | 0.74833727 | 1.445946909 |
| MA0043.2.HLF         | 311  | 0.62558126 | 0.7058281  | 1.429897282 |
| MA0683.1.POU4F2      | 1771 | 0.675564   | 0.7543555  | 1.419908514 |
| MA0148.3.FOXA1       | 4493 | 0.6352972  | 0.72453487 | 1.3642404   |
| MA0831.2.TFE3        | 2401 | 0.8025362  | 0.8722045  | 1.361560911 |
| MA0030.1.FOXF2       | 2474 | 0.65011775 | 0.7373259  | 1.309496832 |
| MA0692.1.TFEB        | 2203 | 0.7947739  | 0.8445178  | 1.305278473 |
| MA0713.1.PHOX2A      | 573  | 0.5099098  | 0.59086764 | 1.302812233 |
| MA0604.1.Atf1        | 879  | 1.15482    | 1.2484417  | 1.29083315  |
| MA0884.1.DUXA        | 1419 | 0.61196584 | 0.68826574 | 1.287731872 |
| MA0723.1.VAX2        | 547  | 0.6083474  | 0.6636892  | 1.282320643 |
| MA0707.1.MNX1        | 375  | 0.55833846 | 0.63539284 | 1.251303163 |
| MA0838.1.CEBPG       | 1779 | 0.7832952  | 0.8846953  | 1.245730467 |
| MA0603.1.Arntl       | 1927 | 0.92505246 | 1.0177896  | 1.235440893 |
| MA1103.1.FOXB2       | 3425 | 0.65566    | 0.7317576  | 1.234158109 |
| MA1112.1.NR4A1       | 1630 | 0.6442691  | 0.7784775  | 1.229674603 |
| MA0114.3.Hnf4a       | 2872 | 0.6970709  | 0.9137632  | 1.224271023 |
| MA0871.1.TFEC        | 768  | 0.7860029  | 0.8455651  | 1.213781852 |
| MA0718.1.RAX         | 537  | 0.5957651  | 0.66168207 | 1.203849103 |
| MA0847.1.FOXD2       | 2277 | 0.58222157 | 0.6544616  | 1.197576878 |
| MA0135.1.Lhx3        | 2132 | 0.57173127 | 0.62766415 | 1.168965383 |
| MA0466.2.CEBPB       | 11   | 0.75908935 | 0.89144915 | 1.150355013 |
| MA0845.1.FOXB1       | 3573 | 0.586207   | 0.65885204 | 1.139548441 |
| MA0468.1.DUX4        | 1519 | 0.62060034 | 0.6825238  | 1.126263037 |
| MA1111.1.NR2F2       | 2646 | 0.6167436  | 0.7510032  | 1.125901033 |
| MA0680.1.PAX7        | 169  | 0.5033955  | 0.5923587  | 1.116796798 |
| MA0512.2.Rxra        | 3838 | 0.6730063  | 0.86270976 | 1.10981685  |
| MA0675.1.NKX6-2      | 1272 | 0.5704339  | 0.6222491  | 1.102415025 |
| MA0674.1.NKX6-1      | 244  | 0.5868199  | 0.66955346 | 1.090921281 |
| MA0624.1.NFATC1      | 185  | 0.52410656 | 0.5987333  | 1.078537003 |
| MA0706.1.MEOX2       | 134  | 0.5946885  | 0.6775434  | 1.063421218 |
| MA0879.1.Dlx1        | 141  | 0.43387082 | 0.48311076 | 1.058160863 |
| MA0093.2.USF1        | 3586 | 0.787873   | 0.8413811  | 1.04067287  |
| MA0644.1.ESX1        | 42   | 0.47383732 | 0.5170309  | 1.039818465 |
| MA0843.1.TEF         | 199  | 0.5475359  | 0.59046316 | 1.025762684 |
| MA0065.2.Pparg::Rxra | 6448 | 0.77363634 | 0.86374295 | 1.009155929 |

|                |      |            |            |             |
|----------------|------|------------|------------|-------------|
| MA1099.1.Hes1  | 1890 | 1.2928712  | 1.3484945  | 1.00415519  |
| MA0862.1.GMEB2 | 549  | 0.93862605 | 0.9989083  | 0.994277989 |
| MA0047.2.Foxa2 | 4857 | 0.63744664 | 0.71984005 | 0.991057142 |

**Table S4. Top 50 IPA Analysis *Upstream Regulator* Signatures in hbHeps D114+, YAP1 OFF D6, and YAP1 ON tumors.** Score is log(p-value) for specific IPA signature, generated from gene expression data for YAP1 ON tumors , YAP1 OFF D6 tumors, hbHeps D114+, and WT Fah<sup>-/-</sup> liver.

| <b>Upstream Regulators</b>   | <b>WT-FAH</b> | <b>HbHep</b> | <b>YAP1 Off</b> | <b>YAP1 On</b> |
|------------------------------|---------------|--------------|-----------------|----------------|
| HNF4A                        | 151.4         | 126.5        | 129.4           | 108.0          |
| 1,2-dithiol-3-thione         | 75.1          | 73.3         | 68.0            | 57.9           |
| methylprednisolone           | 58.1          | 56.1         | 74.1            | 68.0           |
| RICTOR                       | 55.5          | 57.9         | 62.2            | 59.4           |
| TP53                         | 37.6          | 50.4         | 55.9            | 62.7           |
| pirinixic acid               | 44.5          | 51.6         | 51.2            | 52.4           |
| NFE2L2                       | 45.1          | 53.5         | 51.8            | 45.3           |
| PPARA                        | 36.0          | 38.4         | 46.6            | 47.3           |
| metribolone                  | 33.2          | 38.8         | 40.1            | 42.2           |
| methapyrilene                | 28.6          | 40.1         | 38.9            | 37.8           |
| MYC                          | 22.4          | 33.9         | 38.9            | 52.5           |
| ciprofibrate                 | 28.9          | 37.2         | 41.1            | 34.3           |
| ESR1                         | 19.1          | 31.8         | 38.1            | 41.5           |
| TO-901317                    | 31.4          | 32.4         | 35.0            | 33.3           |
| ACOX1                        | 24.4          | 32.9         | 40.7            | 33.8           |
| arsenic trioxide             | 25.2          | 31.1         | 30.8            | 33.2           |
| MYCN                         | 24.4          | 28.4         | 30.0            | 34.6           |
| ST1926                       | 27.3          | 29.1         | 29.7            | 28.5           |
| uranyl nitrate               | 30.7          | 28.1         | 30.0            | 26.6           |
| mono-(2-ethylhexyl)phthalate | 28.0          | 27.5         | 28.1            | 31.8           |
| CLPP                         | 26.3          | 32.3         | 32.2            | 23.1           |
| MAPT                         | 22.2          | 27.2         | 29.4            | 34.2           |
| nitrofurantoin               | 18.3          | 30.7         | 29.7            | 35.2           |
| 5-fluorouracil               | 21.0          | 28.5         | 26.6            | 37.0           |
| CD 437                       | 23.6          | 28.2         | 27.3            | 30.2           |
| TLE3                         | 27.9          | 29.2         | 30.3            | 21.6           |
| HNF1A                        | 27.5          | 24.8         | 27.6            | 26.4           |
| POR                          | 25.0          | 26.1         | 28.1            | 22.3           |
| dexamethasone                | 14.2          | 18.6         | 35.0            | 40.2           |
| gentamicin                   | 22.6          | 26.4         | 25.6            | 22.6           |
| APP                          | 12.3          | 21.5         | 31.8            | 35.8           |
| ONECUT1                      | 24.9          | 22.7         | 24.1            | 21.6           |

|                     |      |      |      |      |
|---------------------|------|------|------|------|
| imatinib            | 17.6 | 21.5 | 25.8 | 30.1 |
| XBP1                | 22.7 | 22.8 | 22.1 | 23.0 |
| PTEN                | 17.8 | 23.9 | 25.4 | 25.4 |
| fenofibrate         | 16.4 | 23.9 | 23.7 | 21.6 |
| NR1I2               | 20.5 | 22.7 | 22.6 | 21.5 |
| Insulin             | 16.1 | 20.4 | 23.8 | 28.2 |
| MAP4K4              | 22.4 | 24.7 | 18.9 | 17.3 |
| LONP1               | 21.2 | 22.3 | 21.2 | 19.3 |
| sirolimus           | 12.3 | 21.0 | 23.0 | 28.8 |
| GnRH analog         | 17.3 | 20.3 | 22.0 | 20.5 |
| dihydrotestosterone | 15.3 | 17.2 | 21.8 | 27.5 |
| lipopolysaccharide  | 6.7  | 13.7 | 32.8 | 32.3 |
| torin1              | 18.4 | 21.3 | 16.2 | 17.4 |
| valproic acid       | 14.4 | 18.4 | 19.3 | 21.3 |
| INSR                | 14.5 | 17.7 | 21.6 | 21.6 |
| beta-estradiol      | 9.7  | 15.7 | 22.6 | 30.0 |
| tunicamycin         | 14.9 | 19.6 | 18.9 | 19.6 |
| NR3C1               | 13.6 | 14.6 | 22.7 | 24.5 |
| TGFB1               | 7.2  | 14.7 | 22.7 | 32.1 |

**Table S5. Top 50 IPA Analysis *Disease and Function* signatures in hbHeps, YAP1 OFF D6, and YAP1 ON tumors.** Score is log(p-value) for specific IPA signature, generated from gene expression data for YAP1 ON tumors , YAP1 OFF D6 tumors, hbHeps D114+, and WT Fah<sup>-/-</sup> liver.

| <b>Disease and Function, Tox Functions</b>                                               | <b>WT-FAH</b> | <b>HbHep</b> | <b>YAP1 Off</b> | <b>YAP1 On</b> |
|------------------------------------------------------------------------------------------|---------------|--------------|-----------------|----------------|
| Liver cancer                                                                             | 31.9          | 39.5         | 47.6            | 52.3           |
| Liver tumor                                                                              | 32.1          | 40.5         | 44.7            | 49.4           |
| Liver carcinoma                                                                          | 29.3          | 36.7         | 43.7            | 49.2           |
| Hepatic steatosis                                                                        | 25.1          | 27.3         | 32.4            | 29.9           |
| Cell death of liver                                                                      | 16.6          | 22.2         | 29.9            | 28.0           |
| Necrosis of liver                                                                        | 16.2          | 21.7         | 29.4            | 27.5           |
| Cell death of kidney cells                                                               | 16.1          | 20.2         | 23.1            | 25.6           |
| Necrosis of liver parenchyma                                                             | 14.6          | 17.6         | 22.6            | 22.0           |
| Cell death of liver cells                                                                | 13.6          | 17.5         | 22.4            | 22.3           |
| Cell death of kidney cell lines                                                          | 14.8          | 17.9         | 18.8            | 20.8           |
| Cell death of hepatocytes                                                                | 14.0          | 17.5         | 21.9            | 21.3           |
| Hepatomegaly                                                                             | 13.9          | 15.6         | 19.3            | 19.7           |
| Hepatocellular carcinoma                                                                 | 11.2          | 14.9         | 20.8            | 22.7           |
| Apoptosis of liver                                                                       | 12.8          | 15.6         | 20.4            | 19.7           |
| Apoptosis of liver cells                                                                 | 12.1          | 14.8         | 19.6            | 18.9           |
| Apoptosis of hepatocytes                                                                 | 11.9          | 14.1         | 19.2            | 18.2           |
| Hepatitis B virus-related hepatocellular carcinoma                                       | 12.4          | 16.3         | 16.2            | 15.8           |
| Proliferation of hepatocytes                                                             | 9.7           | 13.6         | 17.2            | 19.4           |
| Proliferation of liver cells                                                             | 8.8           | 11.9         | 17.2            | 18.9           |
| Cell death of heart cells                                                                | 10.1          | 11.8         | 13.6            | 16.6           |
| Cell death of cardiomyocytes                                                             | 10.0          | 11.7         | 13.5            | 16.6           |
| Hepatitis B surface antigen-negative hepatitis C virus negative hepatocellular carcinoma | 12.5          | 13.0         | 12.9            | 13.4           |
| Liver Damage                                                                             | 8.4           | 11.8         | 16.9            | 15.3           |
| Apoptosis of kidney cell lines                                                           | 10.1          | 12.6         | 12.5            | 15.4           |
| Cell death of heart                                                                      | 9.1           | 11.4         | 12.4            | 15.7           |
| Apoptosis of heart                                                                       | 8.9           | 10.4         | 13.6            | 16.1           |
| Apoptosis of cardiomyocytes                                                              | 8.8           | 10.3         | 13.4            | 15.9           |
| Apoptosis of heart cells                                                                 | 8.6           | 10.1         | 13.2            | 15.6           |
| Intrahepatic cholestasis                                                                 | 12.1          | 11.4         | 12.0            | 10.6           |
| Cell proliferation of kidney cell lines                                                  | 7.2           | 10.5         | 12.4            | 15.7           |
| Cholestasis                                                                              | 11.2          | 11.4         | 10.7            | 10.5           |

|                                                      |      |      |      |      |
|------------------------------------------------------|------|------|------|------|
| Nephrotoxicity                                       | 7.9  | 11.4 | 12.6 | 13.6 |
| Nephromegaly                                         | 8.5  | 11.2 | 11.1 | 13.5 |
| Proximal tubular toxicity                            | 8.1  | 10.6 | 12.4 | 13.3 |
| Progressive intrahepatic cholestasis                 | 11.5 | 10.6 | 10.5 | 8.9  |
| Progressive familial intrahepatic cholestasis type 1 | 11.1 | 10.1 | 10.1 | 8.6  |
| Development of liver tumor                           | 6.3  | 9.6  | 10.9 | 13.1 |
| Enlargement of heart                                 | 6.4  | 9.0  | 10.9 | 12.3 |
| Inflammation of liver                                | 5.7  | 9.0  | 11.6 | 10.6 |
| Hepatic injury                                       | 6.6  | 8.2  | 11.2 | 10.9 |
| Microvesicular hepatic steatosis                     | 8.2  | 8.6  | 8.5  | 10.1 |
| Development of hepatocellular carcinoma              | 5.3  | 8.7  | 8.6  | 10.5 |
| Hepatitis C virus-related hepatocellular carcinoma   | 7.6  | 8.0  | 7.9  | 7.3  |
| Liver Regeneration                                   | 5.8  | 6.9  | 9.0  | 9.1  |
| Liver Hypoplasia                                     | 4.5  | 7.4  | 8.1  | 8.6  |
| Fibrosis of liver                                    | 4.6  | 6.9  | 7.9  | 8.5  |
| Benign neoplasm of liver                             | 5.1  | 7.6  | 6.1  | 6.5  |
| Hepatic adenocarcinoma                               | 3.9  | 6.7  | 7.2  | 9.0  |
| Liver cholangiocarcinoma                             | 4.3  | 6.7  | 7.2  | 8.4  |
| Hepatocellular adenoma                               | 4.9  | 6.7  | 5.9  | 6.3  |
| Glomerulosclerosis                                   | 4.6  | 5.6  | 7.1  | 8.9  |



**Table S6. Top 50 IPA Analysis *Canonical Pathways* signatures in hbHeps, YAP1 OFF D6, and YAP1 ON tumors.** Score is log(p-value) for specific IPA signature, generated from gene expression data for YAP1 ON tumors , YAP1 OFF D6 tumors, hbHeps D114+, and WT Fah<sup>-/-</sup> liver.

| <b>Canonical Pathways</b>                      | <b>WT-FAH</b> | <b>HbHep</b> | <b>YAP1<br/>Off</b> | <b>YAP1<br/>On</b> |
|------------------------------------------------|---------------|--------------|---------------------|--------------------|
| Sirtuin Signaling Pathway                      | 39.5          | 41.5         | 41.2                | 35.2               |
| Mitochondrial Dysfunction                      | 38.2          | 39.4         | 36.4                | 36.8               |
| EIF2 Signaling                                 | 32.8          | 35.0         | 32.6                | 35.7               |
| Oxidative Phosphorylation                      | 29.2          | 30.6         | 27.4                | 25.1               |
| Protein Ubiquitination Pathway                 | 26.6          | 30.7         | 26.2                | 25.6               |
| Regulation of eIF4 and p70S6K Signaling        | 24.9          | 25.7         | 25.5                | 25.0               |
| NRF2-mediated Oxidative Stress Response        | 21.8          | 25.5         | 22.0                | 21.2               |
| Acute Phase Response Signaling                 | 18.9          | 19.2         | 25.5                | 24.6               |
| mTOR Signaling                                 | 15.7          | 18.8         | 20.3                | 19.7               |
| FXR/RXR Activation                             | 15.8          | 13.8         | 18.2                | 17.4               |
| PPAR $\alpha$ /RXR $\alpha$ Activation         | 13.7          | 14.5         | 19.9                | 15.2               |
| PI3K/AKT Signaling                             | 11.0          | 14.1         | 18.4                | 20.6               |
| Iron homeostasis signaling pathway             | 14.1          | 15.2         | 14.5                | 13.3               |
| Senescence Pathway                             | 12.6          | 13.6         | 17.4                | 15.1               |
| RAR Activation                                 | 12.2          | 13.4         | 16.9                | 11.7               |
| Molecular Mechanisms of Cancer                 | 7.2           | 11.6         | 16.7                | 18.1               |
| Xenobiotic Metabolism Signaling                | 12.4          | 14.7         | 13.3                | 10.6               |
| Hypoxia Signaling in the Cardiovascular System | 11.4          | 12.1         | 14.4                | 12.8               |
| LPS/IL-1 Mediated Inhibition of RXR Function   | 13.1          | 12.2         | 13.4                | 11.3               |
| Unfolded protein response                      | 11.0          | 12.5         | 11.6                | 12.3               |
| PTEN Signaling                                 | 8.1           | 9.9          | 16.8                | 16.7               |
| Integrin Signaling                             | 8.7           | 11.8         | 12.5                | 16.9               |
| Clathrin-mediated Endocytosis Signaling        | 10.0          | 12.0         | 12.3                | 14.1               |
| LXR/RXR Activation                             | 12.2          | 9.8          | 13.1                | 12.9               |
| Prostate Cancer Signaling                      | 11.0          | 9.9          | 11.7                | 13.9               |
| Epithelial Adherens Junction Signaling         | 8.1           | 11.8         | 14.4                | 11.8               |
| PXR/RXR Activation                             | 11.5          | 11.4         | 13.0                | 8.5                |
| IGF-1 Signaling                                | 8.9           | 9.2          | 13.9                | 12.3               |
| Insulin Receptor Signaling                     | 9.9           | 9.4          | 11.8                | 11.2               |
| HIPPO signaling                                | 8.9           | 9.6          | 10.7                | 12.9               |
| ERK/MAPK Signaling                             | 8.0           | 9.0          | 10.5                | 13.1               |

|                                                                       |      |      |      |      |
|-----------------------------------------------------------------------|------|------|------|------|
| Super pathway of Cholesterol Biosynthesis                             | 10.2 | 10.6 | 10.6 | 8.8  |
| B Cell Receptor Signaling                                             | 7.2  | 7.8  | 12.8 | 11.7 |
| Mouse Embryonic Stem Cell Pluripotency                                | 7.6  | 9.4  | 11.0 | 10.7 |
| Phagosome Maturation                                                  | 8.7  | 10.1 | 10.4 | 10.5 |
| Ephrin Receptor Signaling                                             | 6.5  | 9.7  | 10.9 | 11.6 |
| Breast Cancer Regulation by Stathmin1                                 | 4.6  | 9.6  | 11.6 | 12.9 |
| Aryl Hydrocarbon Receptor Signaling                                   | 7.4  | 11.1 | 9.0  | 11.0 |
| AMPK Signaling                                                        | 9.9  | 8.7  | 10.1 | 10.1 |
| p70S6K Signaling                                                      | 7.1  | 8.8  | 11.2 | 10.1 |
| NGF Signaling                                                         | 8.9  | 9.2  | 9.1  | 8.9  |
| Acute Myeloid Leukemia Signaling                                      | 7.4  | 8.6  | 10.9 | 10.5 |
| Apoptosis Signaling                                                   | 7.9  | 9.2  | 10.8 | 10.5 |
| Chronic Myeloid Leukemia Signaling                                    | 8.1  | 8.3  | 10.4 | 10.7 |
| Estrogen-Dependent Breast Cancer Signaling                            | 7.0  | 8.7  | 10.6 | 10.6 |
| VEGF Signaling                                                        | 7.9  | 8.6  | 10.2 | 9.9  |
| JAK/Stat Signaling                                                    | 6.2  | 8.4  | 10.8 | 11.6 |
| Production of Nitric Oxide and Reactive Oxygen Species in Macrophages | 7.6  | 8.5  | 10.9 | 10.3 |
| Germ Cell-Sertoli Cell Junction Signaling                             | 6.2  | 9.4  | 10.2 | 10.8 |
| Huntington's Disease Signaling                                        | 9.1  | 7.7  | 9.4  | 10.2 |
| Remodeling of Epithelial Adherens Junctions                           | 6.1  | 9.1  | 10.4 | 11.1 |

## Methods Supplemental Tables

**Table S7. Primer Sequences**

| Primer | Description         | Sequence, 5' to 3'      |
|--------|---------------------|-------------------------|
| P1     | Human YAP1 qPCR_F   | TAGCCCTGCGTAGCCAGTTA    |
| P2     | Human YAP1 qPCR_R   | TCATGCTTAGTCCACTGTCTGT  |
| P3     | Mouse Gapdh qPCR_F  | AGGTCGGTGTGAACGGATTTG   |
| P4     | Mouse Gapdh qPCR_R  | TGTAGACCATGTAGTTGAGGTCA |
| P5     | Mouse Afp qPCR_F    | TGCTGCAAATTACCCATGAT    |
| P6     | Mouse Afp qPCR_R    | CCAAAAACTGGCTTGGATTT    |
| P7     | Mouse Gpc3_qPCR_F   | TCGACAGCCTCTTTCCAGTCA   |
| P8     | Mouse Gpc3_qPCR_R   | GGTCACGTCTTGCTCCTCG     |
| P9     | Mouse Ctgf_qPCR_F   | GGGCCTCTTCTGCGATTTTC    |
| P10    | Mouse Ctgf_qPCR_R   | ATCCAGGCAAGTGCATTGGTA   |
| P11    | Human CYP3A5_qPCR_F | GGTGGTGATTCCAACCTTATGCT |
| P12    | Human CYP3A5_qPCR_R | GCGTGTCTAATTTCAAGGGGA   |
| P13    | Human CES3_qPCR_F   | CAACACCCGTCTTGACCAGTC   |
| P14    | Human CES3_qPCR_R   | CTGGAACGCCTGGCATTTC     |
| P15    | Human OAT_qPCR_F    | GTGGGGCTATACCGTGAAGG    |
| P16    | Human OAT_qPCR_R    | TGGTCCAAAACCATCGTAACTG  |
| P17    | Human ApoA2_qPCR_F  | CTGTGCTACTCCTCACCATCT   |
| P18    | Human ApoA2_qPCR_R  | CTCTCCACACATGGCTCCTTT   |
| P19    | Human CYP2A6_qPCR_F | TCATGAAGATCAGTGAGCGCT   |
| P21    | Human CYP2A6_qPCR_R | TCATGTCCACACAGCACCA     |
| P22    | Human CYP2E1_qPCR_F | ATGTCTGCCCTCGGAGTCA     |
| P23    | Human CYP2E1_qPCR_R | CGATGATGGGAAGCGGGAAA    |
| P24    | sgRNA_human_YAP1    | TGCCCCAGACCGTGCCCATG    |
| P25    | sgRNA_Non_target    | GCGAGGTATTTCGGCTCCGCG   |

**Table S8. IHC Antibodies**

| <b>Antibody</b>     | <b>Dilution</b> | <b>Secondary</b> | <b>Company</b>            | <b>Catalog #</b> |
|---------------------|-----------------|------------------|---------------------------|------------------|
| YAP D8H1X           | 1:100           | Rabbit           | Cell Signaling Technology | 14074            |
| GFP D5.1            | 1:200           | Rabbit           | Cell Signaling Technology | 2956             |
| FAH                 | 1:400           | Rabbit           | Abcam                     | Ab83770          |
| Cleaved Caspase 3   | 1:100           | Rabbit           | Cell Signaling Technology | 9661             |
| FoxA2/Hnf-3 $\beta$ | 1:200           | Rabbit           | Cell Signaling Technology | 8186             |
| Ki67 (SP6)          | 1:100           | Rabbit           | Thermo Fischer            | MA5-14520        |
| Myc-tag             | 1:100           | Rabbit           | Maine Medical             | Vli01            |
| RFP                 | 1:400           | Rabbit           | Rockland                  | 600-401-379      |
| Hnf4 $\alpha$       | 1:200           | Goat             | Santa Cruz                | Sc-6556          |

## Extended Methods

### Plasmid Vectors

#### *Addgene Plasmids:*

H430, pT2/C-Luc//PGK-SB13, Addgene # 20207 (1)

H65, pT3-N90-Beta Catenin, Addgene #31785 (2)

#### *Donated Plasmids:*

H73, pT3-TREt- YAP1<sup>S127A</sup>- IRES-GFP was a gift from the Scott Lowe lab (3). H66, pT2-SB10 was a gift from the Hao Yin Lab.

#### *Generated Plasmids*

H550, pT2\_TreT\_YAP<sup>S127A</sup>\_IRES\_GFP\_PGK\_mcherry

H549, pT2\_TreT\_YAP<sup>S127A</sup>\_IRES\_GFP\_PGK\_FAH

H592, pT2\_PGK\_rtTA

H468, LentiV2\_sg\_YAP1

Lentiv2\_sg\_non-target

H550, H549 and H592 were generated using the New England Biolabs Gibson protocol and master mix kit per the manufacturer's instructions (Cat # E5510S). LentiCRISPR sgRNA cloning was performed according to Zhang Lab protocol as previously described (4).

## Animal Studies Extended

### *Hydrodynamic Injection*

All plasmids used for in vivo injection were purified using the Qiagen Maxi-Prep Endotoxin-free Kit (Qiagen, 12362) according to the manufacturer's instructions. 4-15 ug per plasmid per mouse were mixed together in 0.9% sterile saline at room temperature. Mice were weighed prior to injection and dosed with 10% body weight of the saline mixture. Plasmids were then delivered to mice by hydrodynamic tail vein injection. Specifically, within 5-7 seconds plasmids were continuously and smoothly injected (28). Mice were then warmed by heat lamp or heat pad for a minimum of 30 min to recover from injection shock.

### *TET-ON Studies*

To establish doxycycline-inducible tumors, mice were treated with doxycycline chow (625 mg/kg) (TD.01306, Envigo) for up to 8 weeks following hydrodynamic injection. Doxycycline treated chow was refreshed weekly. Tumors were established in transgenic-rtTA (Tg-rtTA) mice and all downstream analyses were performed in Tg-rtTA mice unless otherwise noted in respective figure legends. The study endpoint for YAP1 ON tumor mice was 2+ signs of distress.

### *FAH Mouse Studies*

Tumor was established in Fah<sup>-/-</sup> mice as described above. Following tumor formation, doxycycline was withdrawn as previously described, and tumor regression monitored. During this time Fah<sup>-/-</sup> mice were continuously treated with nitisionone treated water NTBC (5 mg/ml) to prevent liver damage. Following tumor regression, NTBC was withdrawn and mouse weights monitored >2+ times weekly. Mice were continuously cycled onto NTBC following 10% body weight loss until weight restored. Once weight restored, NTBC was removed and mouse weights monitored.

### **Cell culture**

293fs and HCT116 were gifts from Dr. Tyler Jacks. Cells were cultured in Dulbecco's Modification of Eagle's Medium (DMEM) (Corning 10-013CV), 10% serum (vol/vol) and 1% penicillin/streptomycin (vol/vol) under standard conditions, 37C in 5% CO<sub>2</sub> tissue culture incubator.

### **RNA Extraction, cDNA synthesis, Quantitative PCR**

RNA was extracted from in vitro cell lines using the RNAeasy Qiagen RNA Isolation Kit (Catalog #74104) per the manufacturer's instructions. RNA was extracted from mouse liver tissue using TRIzol RNA Isolation Reagent (15596026) followed by a chloroform extraction. cDNA was synthesized using the High-Capacity cDNA Reverse Transcription Kit (4368814) and 1.5 ug RNA template. Quantitative PCR was performed using the SSoFast EvaGreen Supermix (1725200) and Real-Time PCR Detection System CFX96 by BioRad. Primers sequences are in **Supplementary Table 7**.

### **Histology and Immunohistochemistry**

Mouse liver tissue was fixed with 4% formalin overnight and dehydrated in 70% ethanol. The UMassMed Morphology Core embedded tissues as 4µm paraffin sections and performed H&E staining. For immunohistochemistry staining, briefly tumor sections were deparaffinized with xylene, dehydrated with serial ethanol dilutions, and boiled for 9 minutes with 1 mM citrate buffer (pH6.0) for antigen retrieval. 3% hydrogen peroxide was used to inactivate endogenous peroxidase activities for 10 mins at room temperature. Samples with mouse primary antibodies were treated with M.O.M. Mouse on Mouse Blocking Reagent (Vector Labs, MKB-2213) per the manufacturer's instructions prior to blocking. Tissues were blocked with 5% normal horse serum from ImmPRESS™ HRP Anti-Rabbit IgG (Peroxidase) Polymer Detection Kit (Vector labs, MP-7401-50) for 1 hour at room temperature, incubated with primary antibody 4C overnight (**Supplemental Table 8**), secondary HRP antibody (Vector labs, MP-7401-50) incubation for 1 hour at room temperature, and diaminobenzidine (DAB) substrate/chromogen for development (Fisher Scientific, TA-125-QHDX). Slides were counterstained with hematoxylin, dehydrated in ethanol, xylene washed and sealed with a coverslip for long-term storage. H&E or IHC images were captured using a Leica DMI8 microscope. IHC slides were quantified by selection of four random fields per paraffin embedded section, and positive hepatocytes per 20X field counted.

## **Immunoblot**

Whole cell extracts or mouse liver were lysed in RIPA buffer treated with 1:100 Halt phosphatase cocktail inhibitor (Thermo Fisher 78420) and 1:50 Roche Complete protease inhibitor (11836145001). Lysates were boiled for 5 minutes at 95C with Nupage 4X Sample buffer (Invitrogen NP0007). Protein concentration was measured using Pierce BCA Protein Assay Kit (Catalog #23225). Equal amounts of mouse liver protein were separated on a 4-12% Bis Tris gel and transferred to a nitrocellulose membrane and blocked with Odyssey Blocking buffer. Blots were probed with primary antibodies Gapdh 1:1000 (EMD MAB274), and GFP 1:2000 (CST 2956) overnight at 4C. Blots were then incubated with a fluorescent secondary antibody (LICOR) and imaged on the Odyssey Imaging Platform.

## **Immunofluorescence**

Immunofluorescence was performed on paraffin embedded slides of mouse liver prepared by the UMassMed Morphology Core as described above. Briefly, slides were deparaffinized in xylene, dehydrated in serial ethanol dilutions, boiled for 9 minutes with 1 mM citrate buffer (pH6.0) for antigen retrieval, blocked for one hour at room temperature in Perkin Elmer PNB Buffer 0.5% weight/volume (Catalog #FP1012), and incubated with primary antibody O/N at 4C. Secondary antibody was diluted in PNB block and slides were incubated for one hour at room temperature and counterstained with DAPI (1 ug/ml) and mounted with Prolong Gold Antifade Mounting Media (Thermo Fisher, #P36934). Primary antibody used: MUP 1:200 Cedar Lane Labs, #GAM/MUP, Secondary AlexaFluor Goat 568, 1:200.

## **RNA Sequencing YAP1 ON, YAP1 OFF D6 Tumors**

### *RNA-Sequencing Library Preparation and Analysis*

RNA-Sequencing (RNA-seq) libraries for YAP1 ON and YAP1 OFF D6 were prepared as previously described (5, 6). RNA sequencing was performed in YAP1 ON and OFF tumors without luciferase (n=4 tumors). Library quantification was performed using the KAPA Library Quantification Kit. Libraries were sequenced using the Illumina NextSeq 500 system. RNA-seq reads from each sample (n=4 tumors per group) were aligned to the reference genome using STAR (version 2.5.2b). RSEM (v1.2.31), GENCODE V19 gene annotation were used to quantify gene expression, and htSeq, DESeq2 (1.22.0) for identification of differentially expressed genes (7-10).

## **Ingenuity Analysis**

Functional analyses were generated through the use of IPA (Qiagen, Inc).

## **IVIS Bioluminescent imaging**

At the indicated time post injection, mice were given 200 µl luciferin (15 mg/ml) intraperitoneally. Signal was allowed to stabilize for 10 min, and mice were then anesthetized with 3-5 minutes of 1-3% isoflurane. Mice were

loaded into the Perkin Elmer IVIS machine for capture of luminescent signal (1-minute standard exposure, scale 5e4 to 5e5 radiance).

### **Microarray Data Accession**

Microarray data used in the IPA pathway analysis was accessed through ArrayExpress (<http://www.ebi.ac.uk/microarray-as/ae/>) under the accession numbers E-MEXP-1851 (HB transcriptome), E-MEXP-1852 (HB aCGH), and E-MEXP-1853 (mouse liver) (Cairo et al, 2008).

### **Statistical Analysis**

All statistical analyses were performed using GraphPad Prism 8.

### **TCGA and Microarray Analysis**

For gene correlation analyses, correlation data from the TCGA HCC (n=348) data set was obtained from cBioPortal. E-MEXP-1851 (HB transcriptome) was obtained from ArrayExpress (n=25). Briefly, gene expression data were analyzed using Spearman's correlation analysis.

### **RNA-Sequencing Library Preparation and Analysis in hbHeps**

RNA was extracted from hbHep FAH mice (n=3 mice), and control FAH<sup>-/-</sup> treated with NTBC (n=3 mice) in duplicate. Extracted RNA was prepared into sequencing libraries, and sequenced by GENEWIZ, LLC. (South Plainfield, NJ, USA). Libraries were prepared using paired end-reads, and >15 million reads per sample. Samples were first quantified using the Qubit 2.0, and Agilent Tape Station. Libraries were sequenced using Illumina Hi-seq .

### **RNAseq Analysis in hbHeps**

Transcript quantification was performed using kallisto according to Bray et al. (<https://doi.org/10.1038/nbt.3519>) Paired-end FASTQ files were pseudoaligned (100 bootstraps setting, -b 100) to an index built with an Ensembl FASTA (all cDNA; GRCm38.p6). Gene-level transcript aggregation and statistical comparison between genes (scaled-reads-per-base) were done using sleuth. (<https://doi.org/10.1038/nmeth.4324>).



## References

### Author names in bold designate shared co-first authorship

1. Wiesner SM, Decker SA, Larson JD, Ericson K, Forster C, Gallardo JL, Long C, et al. De novo induction of genetically engineered brain tumors in mice using plasmid DNA. *Cancer Res* 2009;69:431-439.
2. Tward AD, Jones KD, Yant S, Cheung ST, Fan ST, Chen X, Kay MA, et al. Distinct pathways of genomic progression to benign and malignant tumors of the liver. *Proc Natl Acad Sci U S A* 2007;104:14771-14776.
3. Tschaharganeh DF, Xue W, Calvisi DF, Evert M, Michurina TV, Dow LE, Banito A, et al. p53-dependent Nestin regulation links tumor suppression to cellular plasticity in liver cancer. *Cell* 2014;158:579-592.
4. Shalem O, Sanjana NE, Hartenian E, Shi X, Scott DA, Mikkelsen T, Heckl D, et al. Genome-scale CRISPR-Cas9 knockout screening in human cells. *Science* 2014;343:84-87.
5. **Fu Y, Wu PH**, Beane T, Zamore PD, Weng Z. Elimination of PCR duplicates in RNA-seq and small RNA-seq using unique molecular identifiers. *BMC Genomics* 2018;19:531.
6. **Shao DD, Xue W**, Krall EB, Bhutkar A, Piccioni F, Wang X, Schinzel AC, et al. KRAS and YAP1 converge to regulate EMT and tumor survival. *Cell* 2014;158:171-184.
7. Dobin A, Davis CA, Schlesinger F, Drenkow J, Zaleski C, Jha S, Batut P, et al. STAR: ultrafast universal RNA-seq aligner. *Bioinformatics* 2013;29:15-21.
8. Anders S, Pyl PT, Huber W. HTSeq--a Python framework to work with high-throughput sequencing data. *Bioinformatics* 2015;31:166-169.
9. Love MI, Huber W, Anders S. Moderated estimation of fold change and dispersion for RNA-seq data with DESeq2. *Genome Biol* 2014;15:550.
10. Li B, Dewey CN. RSEM: accurate transcript quantification from RNA-Seq data with or without a reference genome. *BMC Bioinformatics* 2011;12:323.

## Supplemental Figure Legends

### Figure S1. Establishment of YAP1 ON conditional HB model

(A-B) Representative immunohistochemistry in YAP1 OFF D3, D6 and D14 tumors, 100  $\mu\text{m}$ . (C-D) H&E scale bars 25  $\mu\text{m}$ , Representative immunohistochemistry in YAP1 OFF D3, and D14 tumors, 100  $\mu\text{m}$  (E) in vivo immunoblot of liver lysates

### Figure S2. YAP1 withdrawal promotes reduced proliferation and a mild increase in cleaved caspase-3 (CC3) in vivo.

(A-B) Representative immunohistochemistry in YAP1 ON and YAP1 OFF D6 tumors, CC3 and Ki67 respectively, n=3, Scale bars 25  $\mu\text{m}$ .

### Figure S3. YAP1 withdrawal promotes long term survival in mice.

(A) Representative histology and immunohistochemistry in YAP1 ON and YAP1 OFF tumors D14, D70, scale bars 25  $\mu\text{m}$  H&E, scale bars 100  $\mu\text{m}$  IHC. (B) Quantification of long term off relative luciferase signal, n=2, SB-rtTA mice.

### Figure S4. Reactivation of YAP1 promotes tumor proliferation.

(A) Quantification of luminescent radiance, mice were treated with doxycycline for 8 weeks prior to withdrawal and monitored for 18+ weeks, n=2 SB-rtTA plasmid, n=3 Tg-rtTA not shown (B) Representative luminescent imaging in one SB-rtTA plasmid mouse. (C) Representative IHC Ki67 in SB-rtTA, (n=4 mice), Scale Bars 100  $\mu\text{m}$ .

### Figure S5. YAP1 OFF induces markers of hepatocyte differentiation.

(A-B) GSEA Analysis in YAP1 OFF D6 vs YAP1 ON tumors. (C-D) Fold change of gene expression in YAP1 ON vs. YAP1 OFF D6 tumors, n=4 tumors, p<0.05, Fold change>2. (E) in vivo immunoblot in Huh6 cells (F) Relative expression of liver differentiation markers in sgNT and sgYAP1 Huh6

### Figure S6. Lineage Tracing of hbHeps

(A) Lineage Tracing Schematic (B) Representative in vivo luminescent imaging in one SB-rtTA plasmid mouse 8 weeks post-doxycycline withdrawal, validating lineage tracing model. The mouse was treated with doxycycline for 8 weeks prior to withdrawal. (C) H&E and immunohistochemistry from SB-rtTA mouse in (B), validating lineage tracing construct, scale bars 100  $\mu\text{m}$  (D) Enhancer peak intersects shared with WT liver in YAP1 ON, YAP1 OFF D14 regressing tumor, and hbHeps YAP1 OFF D33 and D64. (E-G) Total ATAC peak intersects between hbHep cells, WT liver peaks, and YAP1 ON tumors. Not to scale.

### Figure S7. Decreased enhancer occupancy in YAP1 OFF D14 compared to YAP1 ON

(A) Enhancer occupancy plots for ENCODE enhancers postnatal D0, embryonic D11.5 and mouse transcription start sites in YAP1 ON, YAP1 OFF D14 and WT liver, scale bigwig peak signal (B) Biological replicate

**Figure S8. Transient increase in enhancer occupancy in hbHeps D33**

**(A)** Enhancer occupancy plots for ENCODE enhancers postnatal embryonic D11.5 and mouse transcriptions in YAP1 ON, YAP1 OFF D14, hbHeps D33, hbHeps D64, and WT liver. YAP1 ON, YAP1 OFF D14 and WT representative sequencing data, scale bigwig peak signal

**Figure S9. Decreased Tead and Fos-Jun occupancy in hbHeps D33 compared to YAP1 ON Tumors.**

**(A-D)** ATAC-seq DNA footprints shows decreased occupancy at Tead and Fos-Jun motifs in YAP1 OFF D33 hbHeps compared to YAP1 ON

**Figure S10. hbHeps D33 show increased occupancy of canonical liver differentiation transcription factors compared to YAP1 ON.**

**(A-D)** ATAC-seq DNA footprints comparing YAP1 ON Tumor to YAP1 OFF D33 hbHeps

**Figure S11. hbHeps partially recover hepatocyte gene expression.**

**(A)** IPA Ingenuity analysis *Disease and Function* signatures, curated, gene expression data from YAP1 ON, YAP1 OFF D6 tumors (n=4 tumors), hbHeps D114+ (n=3 mice), WT *Fah*<sup>-/-</sup> mice +NTBC (n=3 mice), scale log(p-value) for pathway signatures **(B)** Volcano plot differentially expressed genes, hbHep D114+ *Fah*<sup>+</sup> mice vs WT *Fah*<sup>-/-</sup> mice +NTBC (n=3 mice), P<0.05 **(C)** Hooks 4-gene signature shown for gene expression data from YAP1 ON, YAP1 OFF D6 tumors (n=4 tumors), hbHeps D114+ (n=3 mice), WT *Fah*<sup>-/-</sup> mice +NTBC (n=3 mice) **(D)** Top 10 downregulated genes in hbHep D114+ *Fah*<sup>+</sup> mice vs WT *Fah*<sup>-/-</sup> mice +NTBC (n=3 mice) **(E)** Top 10 upregulated genes in hbHep D114+ *Fah*<sup>+</sup> mice vs WT *Fah*<sup>-/-</sup> mice +NTBC (n=3 mice) **(F-G)** Normalized reads (scaled bases per read) for select genes in YAP1 ON, YAP1 OFF D6 tumors (n=4 tumors), hbHeps D114+ (n=3 mice), WT *Fah*<sup>-/-</sup> mice +NTBC (n=3 mice)

Supplemental Figure 1

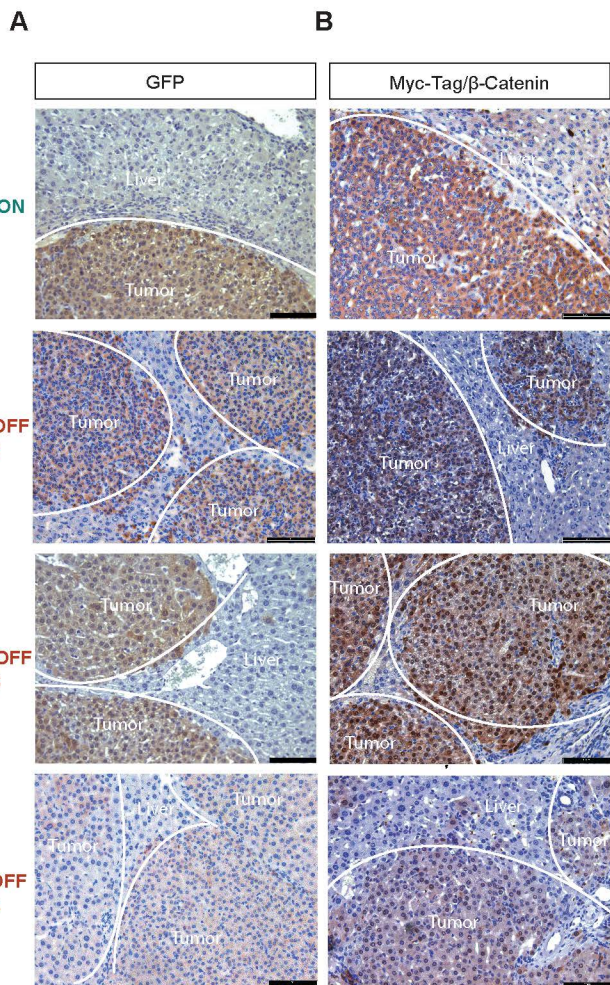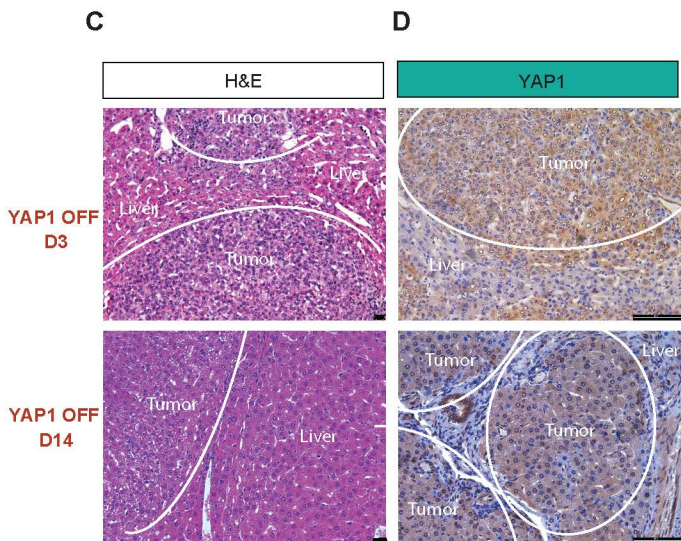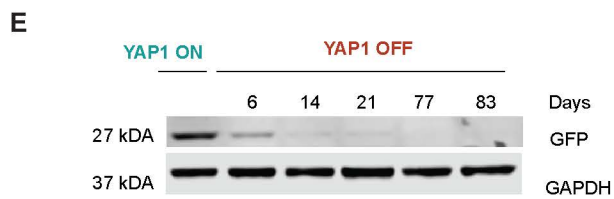



Supplemental Figure 2

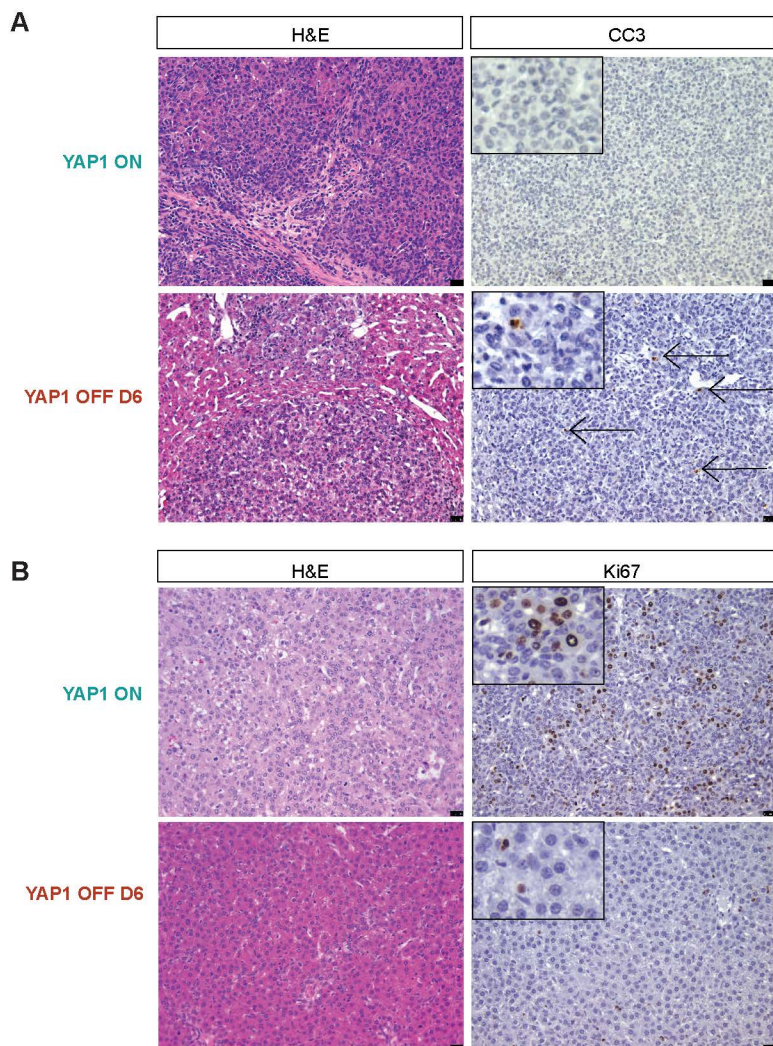

Supplemental Figure 3

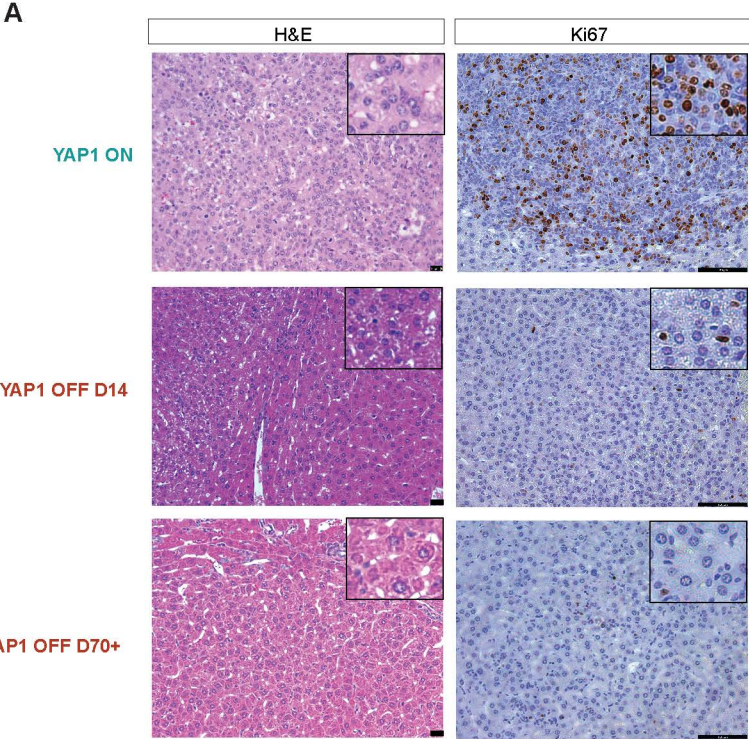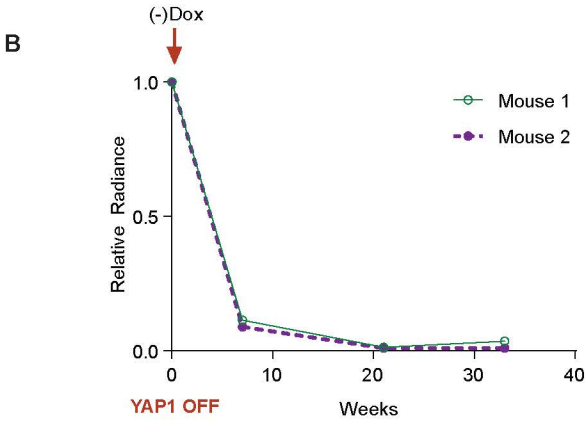

# Supplemental Figure 4

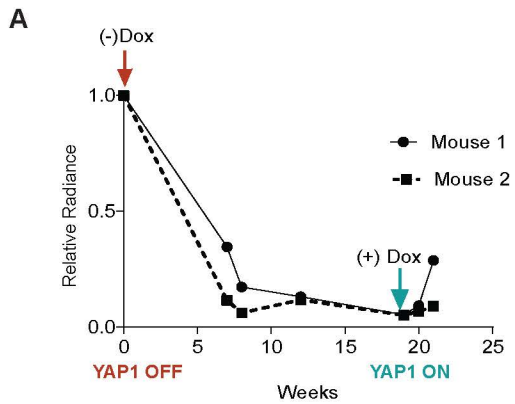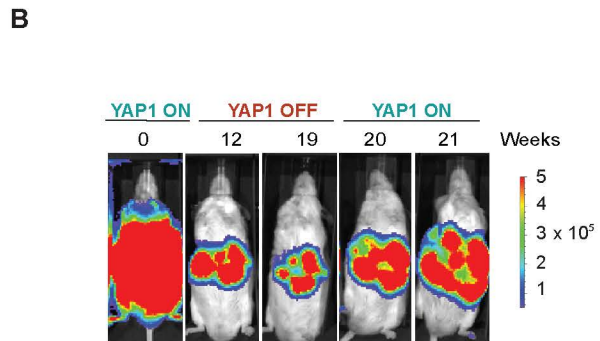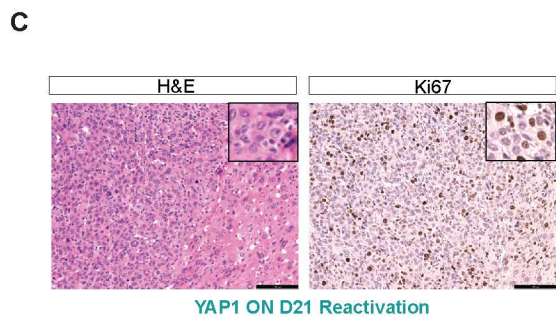

# Supplemental Figure 5

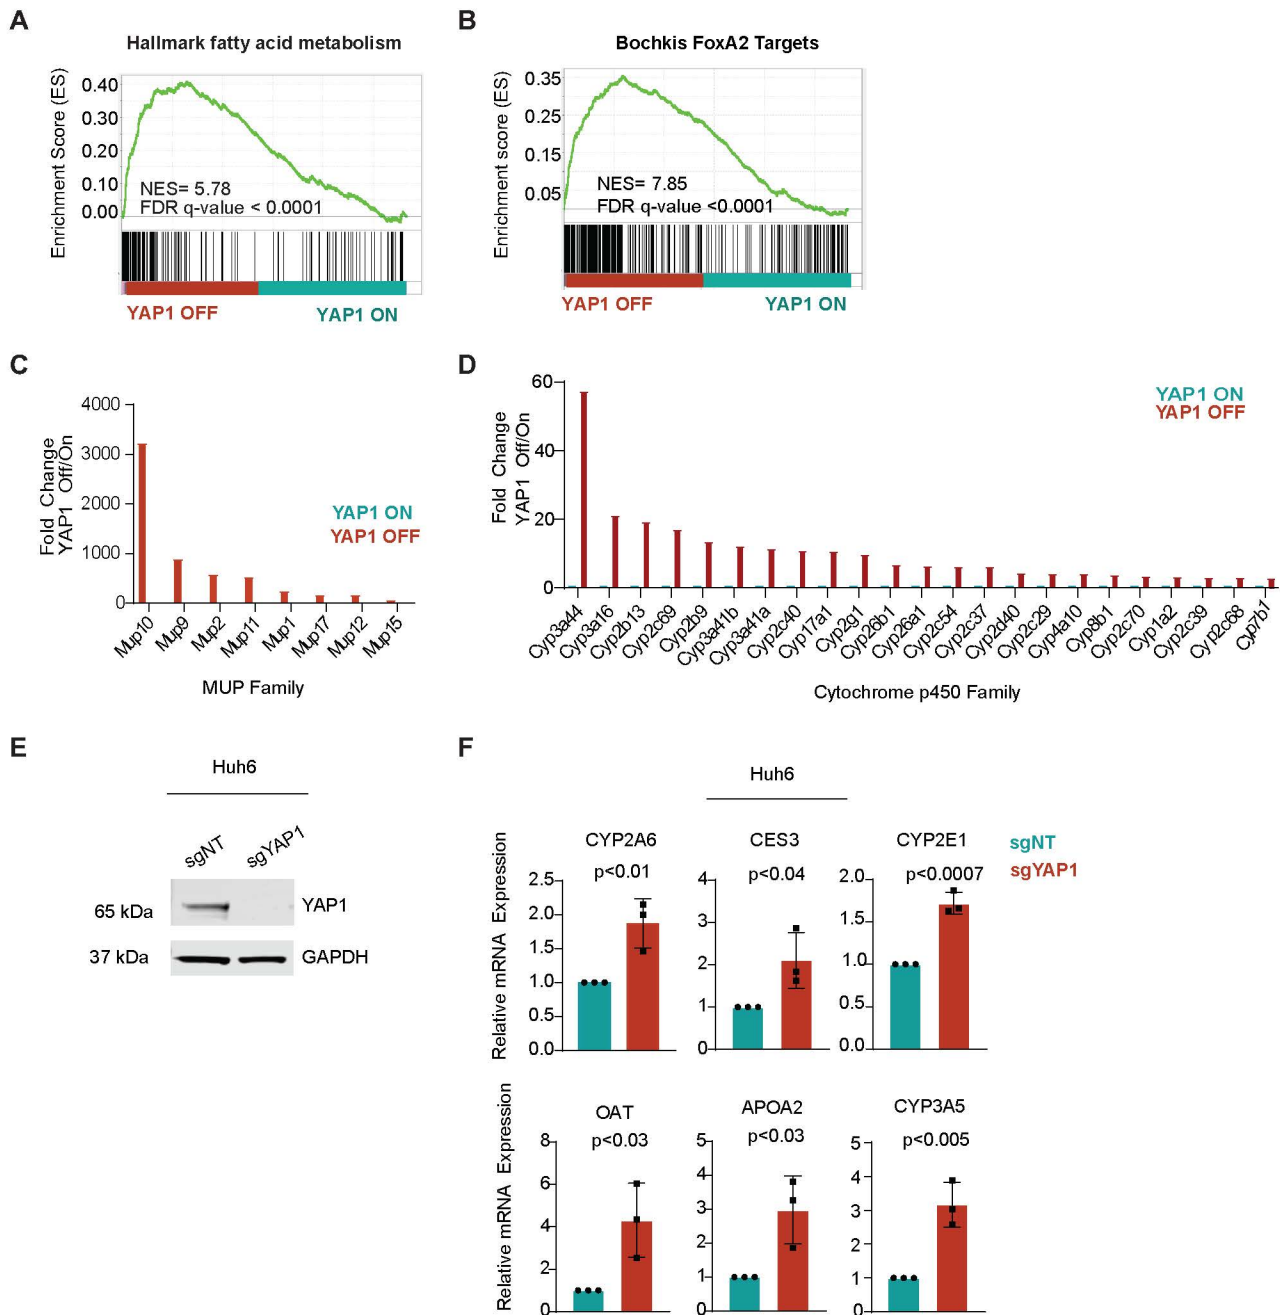



# Supplemental Figure 6

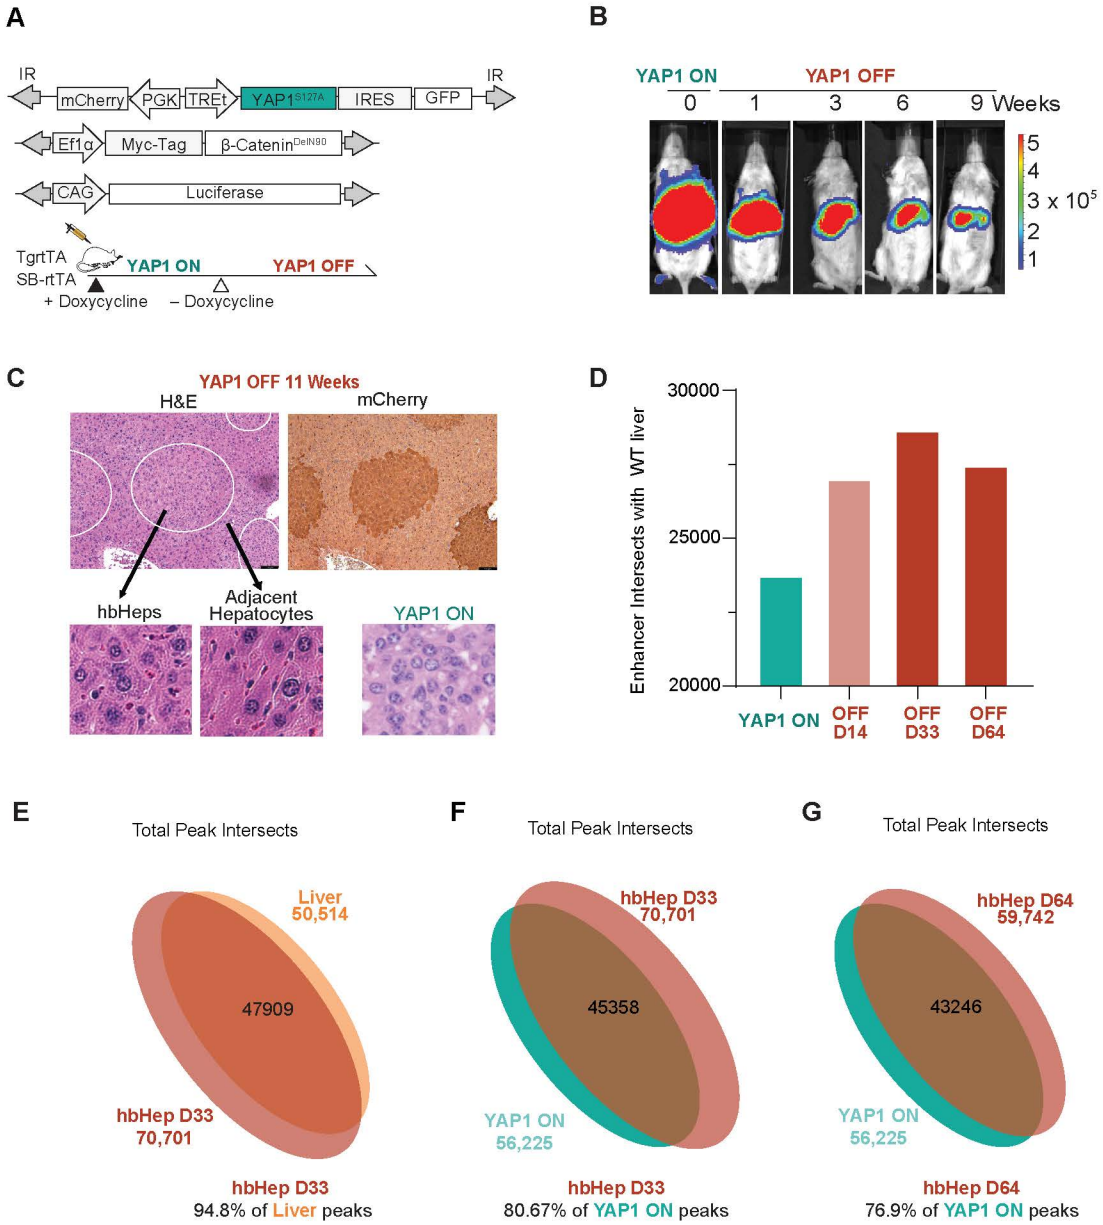



**A**

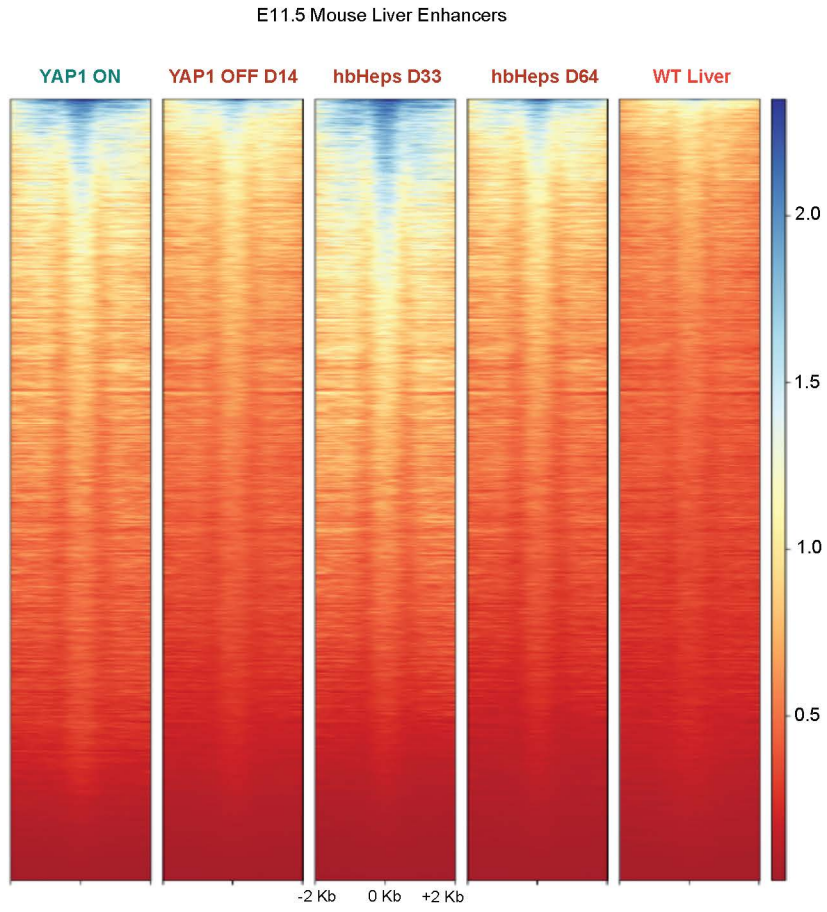

Supplemental Figure 9

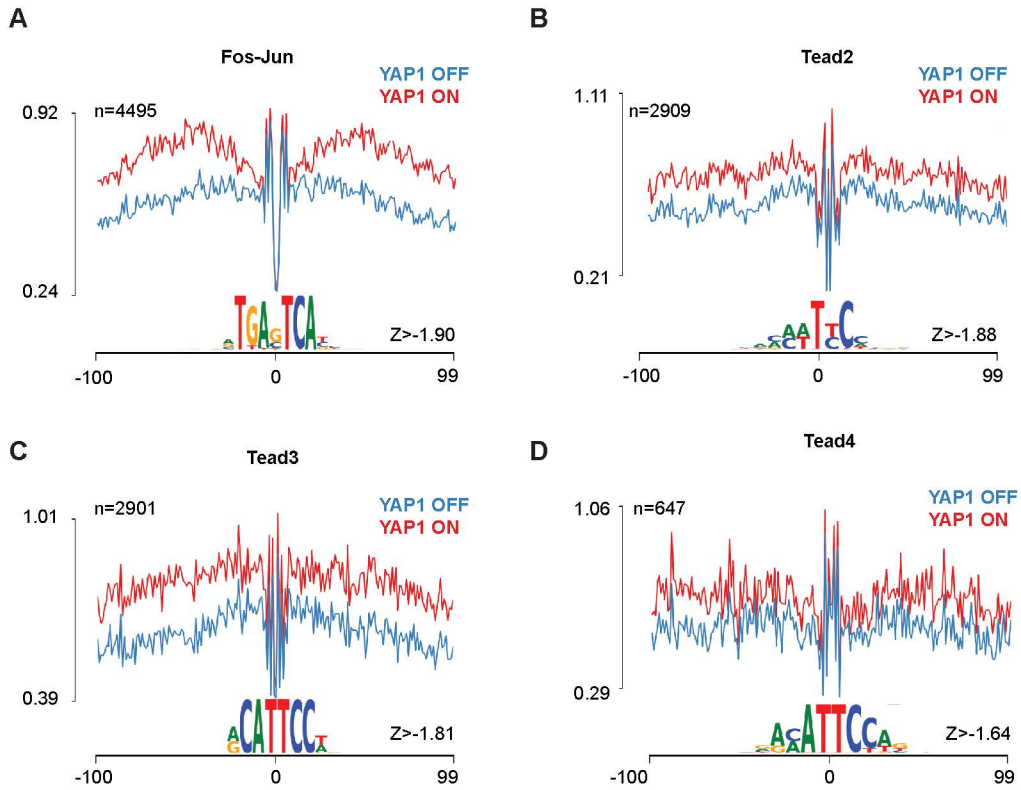

**A**

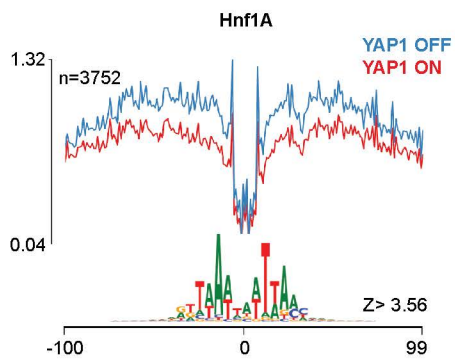

**B**

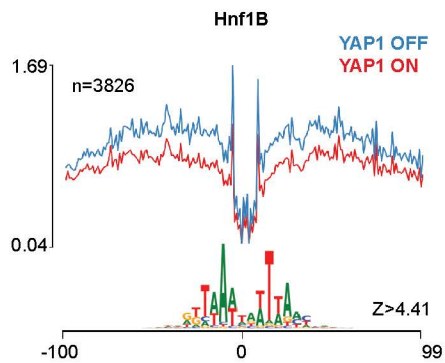

**C**

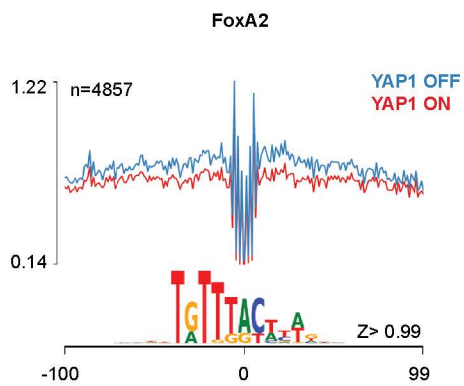

**D**

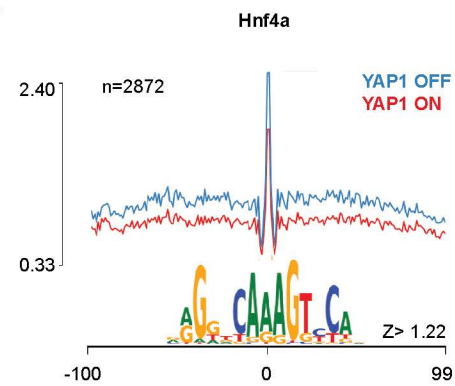



Supplemental Figure 11

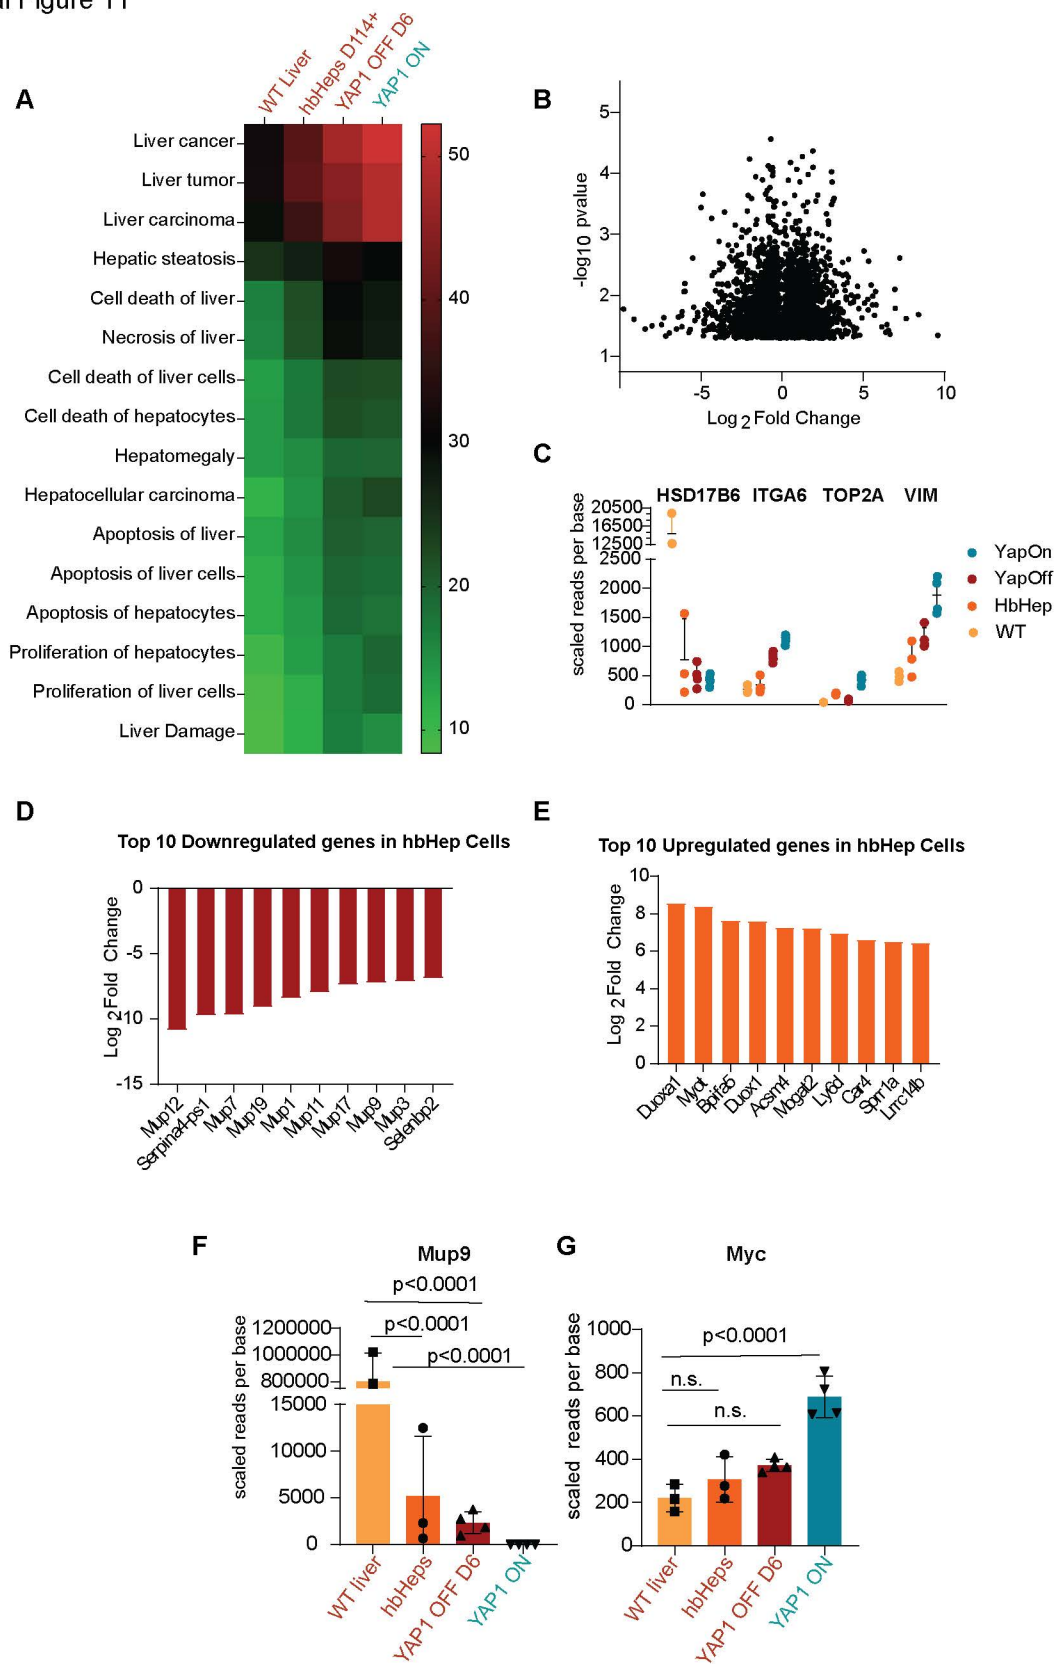

Supplement: NIHMS1744584-supplement-supinfo.pdf [file NIHMS1744584-supplement-supinfo.pdf]
